# Supplementary material
Source: PubMed Central journal article supplement (PMC8018230)
Supplement: NIHMS1684302-supplement-SI.pdf [file NIHMS1684302-supplement-SI.pdf]

## SUPPLEMENTARY INFORMATION

### Structural Motifs for CTD Kinase Specificity on RNA Polymerase II during Eukaryotic Transcription

Mukesh Kumar Venkat Ramani <sup>1,\*</sup>, Edwin E. Escobar <sup>2,\*</sup>, Seema Irani <sup>1</sup>, Joshua E. Mayfield <sup>1</sup>, Rosamaria Y. Moreno <sup>1</sup>, Jamie P. Butalewicz <sup>2</sup>, Victoria C. Cotham <sup>2</sup>, Haoyi Wu <sup>1</sup>, Meena Tadros <sup>1</sup>, Jennifer S. Brodbelt <sup>2</sup> and Yan Jessie Zhang <sup>1,3</sup>

<sup>1</sup> Department of Molecular Biosciences, <sup>2</sup> Department of Chemistry and <sup>3</sup> Institute for Cellular and Molecular Biology, the University of Texas at Austin, Austin, TX, 78712

Corresponding should be addressed to Y. Jessie Zhang ([izhang@cm.utexas.edu](mailto:izhang@cm.utexas.edu)).

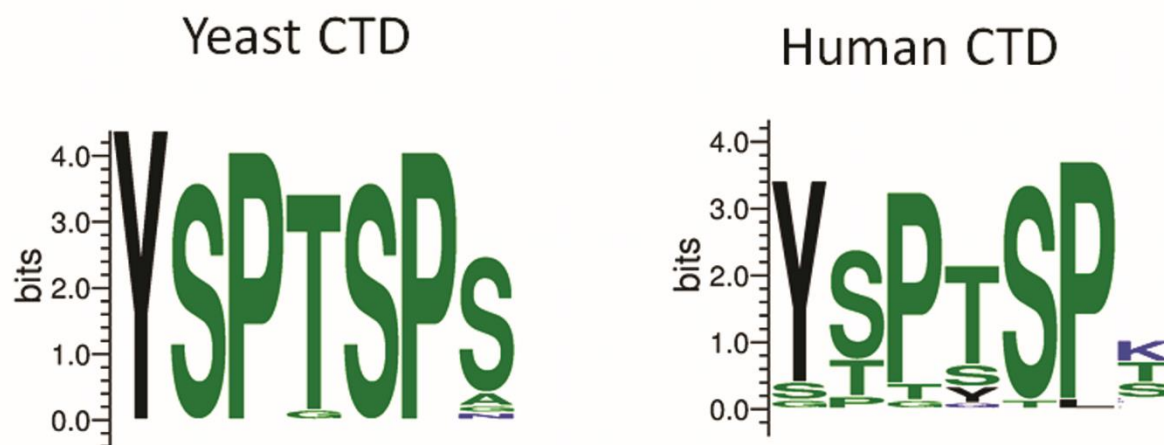

Supplementary Figure 1: Sequence logos of the conservation of Yeast and Human CTD. (LogOdds Logo NCBI: Yu, Y.-K.; Capra, J. A.; Stojmirović, A.; Landsman, D.; Altschul, S. F. Log-Odds Sequence Logos. *Bioinformatics* 2015, 31 (3), 324–331. <https://doi.org/10.1093/bioinformatics/btu634>.)

33 Y TLP QLSLP TLYTRP S P SLYLSPLSLSPLSLSPLSPLT 25  
24LS P K

| Identified Ions    | Theoretical Mass | Observed Mass | Mass             |
|--------------------|------------------|---------------|------------------|
|                    |                  |               | Difference (ppm) |
| a <sup>12</sup>    | 1361.554         | 1361.561      | 5.0              |
| b <sup>11</sup>    | 1302.517         | 1302.527      | 7.6              |
| b <sup>12</sup>    | 1389.549         | 1389.554      | 4.0              |
| b <sup>16</sup>    | 1823.729         | 1823.725      | -2.5             |
| b <sup>10</sup>    | 2094.846         | 2094.856      | 4.6              |
| b <sup>4</sup>     | 489.222          | 489.224       | 2.6              |
| b <sup>5</sup>     | 576.254          | 576.255       | 1.7              |
| b <sup>7</sup>     | 774.355          | 774.358       | 4.0              |
| b <sup>8</sup>     | 937.418          | 937.420       | 2.2              |
| b <sup>9</sup>     | 1038.466         | 1038.469      | 3.2              |
| c <sup>14</sup>    | 1590.660         | 1590.663      | 2.1              |
| c <sup>11</sup>    | 2295.957         | 2295.956      | -0.5             |
| c <sup>7</sup>     | 791.381          | 791.383       | 2.3              |
| c <sup>8</sup>     | 954.445          | 954.439       | -5.7             |
| x <sup>11</sup> +1 | 1163.522         | 1163.523      | 1.0              |
| x <sup>13</sup> +1 | 1347.607         | 1347.597      | -7.1             |
| x <sup>4</sup> +1  | 892.405          | 892.405       | -0.5             |
| y <sup>10</sup>    | 1049.503         | 1049.506      | 3.0              |
| y <sup>11</sup>    | 1136.535         | 1136.539      | 3.4              |
| y <sup>12</sup>    | 1233.588         | 1233.590      | 2.1              |
| y <sup>13</sup>    | 1320.620         | 1320.622      | 1.9              |
| y <sup>14</sup>    | 1483.683         | 1483.674      | -6.0             |
| y <sup>16</sup>    | 1667.768         | 1667.769      | 0.7              |
| y <sup>17</sup>    | 1754.800         | 1754.804      | 2.3              |
| y <sup>10</sup>    | 2018.851         | 2018.858      | 3.3              |
| y <sup>10</sup>    | 2119.899         | 2119.900      | 0.7              |
| y <sup>23</sup>    | 2481.062         | 2481.072      | 3.8              |
| y <sup>24</sup>    | 2568.095         | 2568.097      | 1.0              |
| y <sup>26</sup>    | 2793.206         | 2793.207      | 0.6              |
| y <sup>3</sup>     | 330.190          | 330.190       | 0.2              |
| y <sup>5</sup>     | 528.291          | 528.291       | 1.3              |
| y <sup>5</sup> -1  | 527.283          | 527.281       | -3.0             |
| y <sup>6</sup>     | 615.323          | 615.323       | 0.8              |
| y <sup>7</sup>     | 778.386          | 778.392       | 7.4              |
| y <sup>8</sup>     | 865.418          | 865.420       | 2.5              |
| y <sup>9</sup>     | 962.471          | 962.472       | 1.3              |
| z <sup>13</sup>    | 1304.601         | 1304.594      | -5.4             |
| z <sup>4</sup>     | 415.219          | 415.219       | -0.1             |
| z <sup>6</sup>     | 599.304          | 599.303       | -1.4             |

34 Y TLP QLSPLTLYTRP SLSPLSLSPLSPLSPLSPLSPLT 25  
24LS P K

| Identified Ions    | Theoretical Mass | Observed Mass | Mass             |
|--------------------|------------------|---------------|------------------|
|                    |                  |               | Difference (ppm) |
| a <sup>12</sup> +1 | 1282.596         | 1282.593      | -2.1             |
| a <sup>6</sup>     | 645.312          | 645.314       | 2.1              |
| a <sup>7</sup>     | 746.360          | 746.357       | -3.5             |
| a <sup>8</sup>     | 909.423          | 909.421       | -2.0             |
| b <sup>11</sup>    | 1222.551         | 1222.559      | 7.1              |
| b <sup>12</sup>    | 1309.583         | 1309.586      | 2.6              |
| b <sup>14</sup>    | 1493.667         | 1493.666      | -1.1             |
| b <sup>22</sup>    | 2441.994         | 2441.999      | 1.9              |
| b <sup>4</sup>     | 489.222          | 489.222       | 0.1              |
| b <sup>8</sup>     | 937.418          | 937.420       | 2.2              |
| b <sup>9</sup>     | 1038.466         | 1038.467      | 0.7              |
| c <sup>14</sup>    | 1510.694         | 1510.694      | -0.2             |
| c <sup>21</sup>    | 2295.957         | 2295.955      | -1.1             |
| c <sup>6</sup>     | 690.333          | 690.334       | 0.1              |
| c <sup>7</sup>     | 791.381          | 791.382       | 1.6              |
| c <sup>8</sup>     | 892.405          | 892.402       | -3.5             |
| x <sup>6</sup> +1  | 1129.469         | 1129.467      | -2.4             |
| y <sup>11</sup>    | 1216.501         | 1216.491      | -8.7             |
| y <sup>12</sup>    | 1313.554         | 1313.556      | 1.3              |
| y <sup>13</sup>    | 1400.586         | 1400.588      | 1.3              |
| y <sup>13</sup> -1 | 1399.578         | 1399.582      | 2.5              |
| y <sup>14</sup>    | 1563.649         | 1563.650      | 0.1              |
| y <sup>16</sup>    | 1747.734         | 1747.736      | 1.2              |
| y <sup>17</sup>    | 1834.766         | 1834.769      | 1.7              |
| y <sup>10</sup>    | 2018.851         | 2018.856      | 2.3              |
| y <sup>10</sup>    | 2119.899         | 2119.900      | 0.7              |
| y <sup>21</sup>    | 2282.962         | 2282.968      | 2.7              |
| y <sup>23</sup>    | 2481.062         | 2481.069      | 2.5              |
| y <sup>24</sup>    | 2568.095         | 2568.100      | 2.1              |
| y <sup>26</sup> -1 | 2792.198         | 2792.194      | -1.5             |
| y <sup>3</sup>     | 330.190          | 330.191       | 0.9              |
| y <sup>5</sup>     | 528.291          | 528.292       | 1.8              |
| y <sup>6</sup>     | 615.323          | 615.324       | 1.1              |
| y <sup>7</sup>     | 778.386          | 778.391       | 5.9              |
| y <sup>9</sup>     | 962.471          | 962.472       | 0.7              |
| z <sup>13</sup>    | 1384.567         | 1384.571      | 2.6              |
| z <sup>6</sup>     | 599.304          | 599.305       | 1.0              |
| z <sup>8</sup>     | 849.399          | 849.400       | 0.5              |

35 Y TLP QLSPLTLYTRP SLSPLSLSPLSPLSPLSPLSPLT 25  
24LS P K

| Identified Ions    | Theoretical Mass | Observed Mass | Mass             |
|--------------------|------------------|---------------|------------------|
|                    |                  |               | Difference (ppm) |
| a <sup>13</sup>    | 1628.736         | 1628.733      | -1.9             |
| a <sup>17</sup>    | 1812.821         | 1812.816      | -2.8             |
| a <sup>6</sup>     | 645.312          | 645.314       | 2.2              |
| a <sup>8</sup>     | 909.423          | 909.424       | 1.3              |
| b <sup>11</sup>    | 1222.551         | 1222.552      | 1.1              |
| b <sup>12</sup>    | 1309.583         | 1309.586      | 2.6              |
| b <sup>14</sup>    | 1493.667         | 1493.667      | -0.6             |
| b <sup>18</sup>    | 1927.848         | 1927.848      | 0.1              |
| b <sup>22</sup>    | 2362.028         | 2362.026      | -0.6             |
| b <sup>23</sup>    | 2449.060         | 2449.039      | -8.7             |
| b <sup>4</sup>     | 489.222          | 489.223       | 0.9              |
| b <sup>6</sup>     | 673.307          | 673.310       | 4.0              |
| b <sup>7</sup>     | 774.355          | 774.357       | 3.1              |
| b <sup>8</sup>     | 937.418          | 937.420       | 1.6              |
| b <sup>9</sup>     | 1038.466         | 1038.466      | 0.4              |
| c <sup>14</sup>    | 1510.694         | 1510.695      | 0.9              |
| c <sup>6</sup>     | 690.333          | 690.333       | -1.4             |
| c <sup>7</sup>     | 791.381          | 791.382       | 1.5              |
| c <sup>8</sup>     | 954.445          | 954.444       | -0.8             |
| x <sup>11</sup> +1 | 1243.488         | 1243.491      | 2.2              |
| y <sup>10</sup>    | 1129.469         | 1129.469      | 0.1              |
| y <sup>11</sup>    | 1216.501         | 1216.501      | 0.2              |
| y <sup>12</sup>    | 1313.554         | 1313.556      | 1.3              |
| y <sup>12</sup> -1 | 1312.546         | 1312.547      | 0.5              |
| y <sup>13</sup>    | 1400.586         | 1400.587      | 0.8              |
| y <sup>14</sup>    | 1563.649         | 1563.652      | 1.4              |
| y <sup>15</sup>    | 1650.681         | 1650.692      | 6.3              |
| y <sup>16</sup>    | 1747.734         | 1747.736      | 1.0              |
| y <sup>17</sup>    | 1834.766         | 1834.771      | 2.7              |
| y <sup>19</sup>    | 2018.851         | 2018.856      | 2.2              |
| y <sup>20</sup>    | 2119.899         | 2119.900      | 0.6              |
| y <sup>21</sup>    | 2282.962         | 2282.968      | 2.4              |
| y <sup>23</sup>    | 2481.062         | 2481.061      | -0.6             |
| y <sup>24</sup>    | 2568.095         | 2568.098      | 1.4              |
| y <sup>26</sup> -1 | 2792.198         | 2792.199      | 0.5              |
| y <sup>5</sup>     | 608.257          | 608.257       | -0.8             |
| y <sup>5</sup> -1  | 607.249          | 607.249       | -0.2             |
| y <sup>6</sup>     | 695.289          | 695.290       | 1.9              |
| y <sup>7</sup>     | 858.352          | 858.353       | 0.2              |
| y <sup>8</sup>     | 945.385          | 945.384       | -0.7             |
| y <sup>9</sup>     | 1042.437         | 1042.438      | 0.6              |
| z <sup>10</sup>    | 1113.451         | 1113.457      | 6.1              |
| z <sup>4</sup>     | 495.186          | 495.186       | 0.9              |
| z <sup>6</sup>     | 679.270          | 679.268       | -3.3             |

Supplementary Figure 2: Lists of fragment ions for peptides analyzed in Figure 1B by UVPD-MS for repeats 33,34 and 35. In each case, the 3+ charge state was selected, and UVPD was performed using 2 pulses (1.5 mJ per pulse). The identified site of phosphorylation is shaded in blue in the sequence map above each table.

41

N Y[S]P[L]T[S]P[L]T[Y]S P T TLP K C

| Identified Ions    | Theoretical Mass | Observed Mass | Mass Difference (ppm) |
|--------------------|------------------|---------------|-----------------------|
| a <sup>12</sup> +1 | 1335.551         | 1335.554      | 2.0                   |
| a <sup>6</sup> +1  | 605.294          | 605.293       | -1.6                  |
| a <sup>8</sup> +1  | 869.405          | 869.403       | -1.8                  |
| a <sup>2</sup>     | 222.100          | 222.101       | 1.3                   |
| b <sup>12</sup>    | 1362.538         | 1362.539      | 1.0                   |
| b <sup>4</sup>     | 448.196          | 448.196       | 1.1                   |
| b <sup>8</sup>     | 896.392          | 896.393       | 2.0                   |
| c <sup>2</sup>     | 267.122          | 267.122       | 2.0                   |
| c <sup>4</sup>     | 465.222          | 465.223       | 1.3                   |
| c <sup>6</sup>     | 649.307          | 649.306       | -2.1                  |
| x <sup>13</sup> +1 | 1469.620         | 1469.620      | 0.1                   |
| x <sup>6</sup> +1  | 736.292          | 736.288       | -4.9                  |
| x <sup>7</sup> +1  | 899.355          | 899.354       | -1.7                  |
| x <sup>8</sup> +1  | 1000.403         | 1000.400      | -2.9                  |
| x <sup>10</sup>    | 1183.480         | 1183.482      | 1.4                   |
| x <sup>11</sup>    | 1284.528         | 1284.531      | 2.6                   |
| y <sup>10</sup>    | 1157.501         | 1157.503      | 2.2                   |
| y <sup>11</sup>    | 1258.548         | 1258.551      | 2.3                   |
| y <sup>12</sup>    | 1355.601         | 1355.603      | 1.4                   |
| y <sup>13</sup>    | 1442.633         | 1442.634      | 0.9                   |
| y <sup>2</sup>     | 243.158          | 243.159       | 1.5                   |
| y <sup>7</sup>     | 872.368          | 872.370       | 2.0                   |
| y <sup>8</sup>     | 973.416          | 973.418       | 2.5                   |
| y <sup>9</sup>     | 1070.469         | 1070.461      | -7.5                  |
| z <sup>11</sup>    | 1242.529         | 1242.533      | 2.5                   |
| z <sup>13</sup>    | 1426.614         | 1426.619      | 3.6                   |
| z <sup>8</sup>     | 957.397          | 957.392       | -5.2                  |

42

N Y[S]P[L]T[S]P[L]T[Y]S P T TLP K C

| Identified Ions    | Theoretical Mass | Observed Mass | Mass Difference (ppm) |
|--------------------|------------------|---------------|-----------------------|
| a <sup>6</sup> +1  | 685.260          | 685.261       | 0.9                   |
| a <sup>10</sup> +1 | 1036.403         | 1036.399      | -3.5                  |
| a <sup>10</sup>    | 1132.448         | 1132.447      | -0.9                  |
| a <sup>12</sup>    | 1334.543         | 1334.544      | 0.3                   |
| a <sup>13</sup>    | 1431.596         | 1431.593      | -2.1                  |
| a <sup>8</sup>     | 948.363          | 948.358       | -4.9                  |
| b <sup>12</sup>    | 1362.538         | 1362.541      | 2.0                   |
| b <sup>7</sup>     | 813.295          | 813.295       | 0.4                   |
| b <sup>8</sup>     | 976.358          | 976.359       | 1.5                   |
| c <sup>11</sup>    | 1278.517         | 1278.517      | 0.2                   |
| c <sup>2</sup>     | 267.122          | 267.122       | 2.1                   |
| c <sup>7</sup>     | 830.321          | 830.321       | -0.5                  |
| c <sup>8</sup>     | 993.384          | 993.387       | 2.7                   |
| x <sup>13</sup> +1 | 1469.620         | 1469.618      | -1.2                  |
| x <sup>8</sup> +1  | 920.437          | 920.435       | -1.3                  |
| x <sup>11</sup>    | 1284.528         | 1284.531      | 2.4                   |
| x <sup>4</sup>     | 471.233          | 471.233       | 0.9                   |
| x <sup>7</sup>     | 818.381          | 818.380       | -1.3                  |
| y <sup>10</sup>    | 1157.501         | 1157.504      | 2.9                   |
| y <sup>11</sup>    | 1258.548         | 1258.548      | -0.3                  |
| y <sup>12</sup>    | 1355.601         | 1355.602      | 0.9                   |
| y <sup>13</sup>    | 1442.633         | 1442.634      | 0.9                   |
| y <sup>2</sup>     | 243.158          | 243.159       | 1.4                   |
| y <sup>3</sup>     | 344.206          | 344.206       | 0.9                   |
| y <sup>5</sup>     | 542.306          | 542.307       | 0.5                   |
| y <sup>6</sup>     | 629.338          | 629.340       | 1.9                   |
| y <sup>7</sup>     | 792.402          | 792.403       | 1.7                   |
| y <sup>8</sup>     | 893.449          | 893.450       | 1.1                   |
| y <sup>9</sup>     | 990.502          | 990.504       | 1.9                   |
| z <sup>11</sup>    | 1242.529         | 1242.530      | 0.1                   |
| z <sup>13</sup>    | 1426.614         | 1426.616      | 1.1                   |
| z <sup>4</sup>     | 429.235          | 429.235       | 0.8                   |
| z <sup>6</sup>     | 613.320          | 613.320       | 1.1                   |
| z <sup>8</sup>     | 877.431          | 877.431       | 0.3                   |

Supplementary Figure 3: Lists of fragment ions for peptides analyzed in Figure 1B by UVPD-MS for repeats 41 and 42. In each case, the 3+ charge state was selected, and UVPD was performed using 2 pulses (1.5 mJ per pulse). The identified site of phosphorylation is shaded in blue in the sequence map above each table.

43 Y S L P T I S L P I T L V I S L P L T S P L V L V L T L P L T I S L P K

| Identified Ions    | Mass             |               |                  |
|--------------------|------------------|---------------|------------------|
|                    | Theoretical Mass | Observed Mass | Difference (ppm) |
| a <sup>14</sup> +1 | 1517.657         | 1517.659      | 2.0              |
| a <sup>9</sup> +1  | 956.437          | 956.440       | 3.6              |
| a <sup>15</sup>    | 1679.712         | 1679.713      | 0.5              |
| a <sup>7</sup>     | 705.333          | 705.334       | 0.5              |
| a <sup>8</sup>     | 868.397          | 868.393       | -3.7             |
| b <sup>11</sup>    | 1181.524         | 1181.521      | -3.0             |
| b <sup>14</sup>    | 1544.644         | 1544.649      | 3.3              |
| b <sup>15</sup>    | 1707.707         | 1707.706      | -0.3             |
| b <sup>16</sup>    | 1808.755         | 1808.759      | 2.6              |
| b <sup>2</sup>     | 250.095          | 250.096       | 1.2              |
| b <sup>4</sup>     | 448.196          | 448.196       | 0.5              |
| b <sup>7</sup>     | 733.328          | 733.329       | 1.0              |
| b <sup>8</sup>     | 896.392          | 896.393       | 1.6              |
| b <sup>9</sup>     | 983.424          | 983.425       | 1.8              |
| c <sup>14</sup>    | 1561.670         | 1561.677      | 4.6              |
| c <sup>2</sup>     | 267.122          | 267.122       | 2.0              |
| c <sup>7</sup>     | 750.355          | 750.357       | 2.8              |
| x <sup>11</sup> +1 | 1283.556         | 1283.555      | -0.7             |
| x <sup>4</sup> +1  | 458.225          | 458.225       | 0.1              |
| x <sup>4</sup>     | 457.217          | 457.218       | 0.8              |
| x <sup>7</sup>     | 818.381          | 818.383       | 2.5              |
| x <sup>8</sup>     | 917.449          | 917.451       | 1.3              |
| y <sup>10</sup>    | 1155.521         | 1155.524      | 2.4              |
| y <sup>11</sup>    | 1256.569         | 1256.565      | -3.5             |
| y <sup>12</sup>    | 1353.622         | 1353.623      | 1.3              |
| y <sup>13</sup>    | 1440.654         | 1440.657      | 2.1              |
| y <sup>14</sup>    | 1603.717         | 1603.722      | 3.0              |
| y <sup>15</sup>    | 1704.755         | 1704.752      | -7.5             |
| y <sup>16</sup>    | 1801.818         | 1801.821      | 1.9              |
| y <sup>19</sup>    | 2086.950         | 2086.954      | 2.0              |
| y <sup>2</sup>     | 243.158          | 243.159       | 1.2              |
| y <sup>3</sup>     | 330.190          | 330.191       | 1.3              |
| y <sup>5</sup>     | 528.291          | 528.291       | 1.2              |
| y <sup>6</sup>     | 629.338          | 629.339       | 1.4              |
| y <sup>7</sup>     | 792.402          | 792.403       | 1.3              |
| y <sup>8</sup>     | 891.470          | 891.476       | 6.4              |
| y <sup>9</sup>     | 988.523          | 988.524       | 1.5              |
| z <sup>11</sup>    | 1240.550         | 1240.549      | -0.8             |
| z <sup>4</sup>     | 415.219          | 415.219       | -0.5             |
| z <sup>6</sup>     | 613.320          | 613.320       | 0.6              |
| z <sup>8</sup>     | 875.451          | 875.453       | 2.1              |

44 Y S L P T I S L P T L V I S L P I T S L P L V L V L T L P T S L P K

| Identified Ions    | Mass             |               |                  |
|--------------------|------------------|---------------|------------------|
|                    | Theoretical Mass | Observed Mass | Difference (ppm) |
| a <sup>14</sup> +1 | 1338.622         | 1338.621      | -0.6             |
| a <sup>9</sup> +1  | 956.437          | 956.427       | -9.6             |
| a <sup>12</sup>    | 1240.561         | 1240.553      | -6.7             |
| a <sup>8</sup>     | 868.397          | 868.397       | 0.7              |
| b <sup>11</sup>    | 1181.524         | 1181.522      | -1.7             |
| b <sup>12</sup>    | 1268.556         | 1268.557      | 0.9              |
| b <sup>14</sup>    | 1464.677         | 1464.681      | 2.8              |
| b <sup>15</sup>    | 1627.741         | 1627.743      | 1.3              |
| b <sup>16</sup>    | 1728.788         | 1728.790      | 0.7              |
| b <sup>2</sup>     | 250.095          | 250.096       | 0.6              |
| b <sup>4</sup>     | 448.196          | 448.196       | -0.1             |
| b <sup>7</sup>     | 733.328          | 733.330       | 2.6              |
| b <sup>8</sup>     | 896.392          | 896.393       | 1.4              |
| b <sup>9</sup>     | 983.424          | 983.425       | 1.3              |
| c <sup>14</sup>    | 1481.704         | 1481.706      | 1.8              |
| c <sup>2</sup>     | 267.122          | 267.122       | 1.6              |
| c <sup>7</sup>     | 750.355          | 750.356       | 2.3              |
| c <sup>8</sup>     | 913.418          | 913.420       | 2.0              |
| c <sup>9</sup>     | 1000.450         | 1000.450      | 0.4              |
| y <sup>10</sup>    | 1155.521         | 1155.523      | 1.7              |
| y <sup>11</sup>    | 1256.569         | 1256.570      | 0.7              |
| y <sup>12</sup>    | 1353.622         | 1353.623      | 0.8              |
| y <sup>13</sup>    | 1440.654         | 1440.656      | 1.8              |
| y <sup>14</sup>    | 1603.717         | 1603.722      | 2.8              |
| y <sup>15</sup>    | 1801.818         | 1801.820      | 1.3              |
| y <sup>19</sup>    | 2086.950         | 2086.950      | 0.2              |
| y <sup>2</sup>     | 243.158          | 243.159       | 0.7              |
| y <sup>3</sup>     | 330.190          | 330.191       | 0.6              |
| y <sup>5</sup>     | 528.291          | 528.291       | 0.9              |
| y <sup>6</sup>     | 629.338          | 629.339       | 0.9              |
| y <sup>7</sup>     | 792.402          | 792.403       | 0.1              |
| y <sup>8</sup>     | 891.470          | 891.473       | 1.4              |
| y <sup>9</sup>     | 988.523          | 988.525       | 2.1              |
| z <sup>6</sup>     | 693.286          | 693.286       | -0.5             |

45 Y S L P T S L P T L V I S L P I T S L P L V L V L T L P L T I S L P K

| Identified Ions    | Mass             |               |                  |
|--------------------|------------------|---------------|------------------|
|                    | Theoretical Mass | Observed Mass | Difference (ppm) |
| a <sup>14</sup> +1 | 1517.657         | 1517.660      | 2.5              |
| b <sup>11</sup>    | 1261.490         | 1261.492      | 1.2              |
| b <sup>12</sup>    | 1348.522         | 1348.524      | 1.4              |
| b <sup>14</sup>    | 1544.644         | 1544.646      | 1.8              |
| b <sup>15</sup>    | 1707.707         | 1707.709      | 1.2              |
| b <sup>16</sup>    | 1808.755         | 1808.757      | 1.4              |
| b <sup>4</sup>     | 448.196          | 448.196       | 0.1              |
| b <sup>7</sup>     | 813.295          | 813.295       | 0.6              |
| b <sup>8</sup>     | 976.358          | 976.359       | 0.9              |
| b <sup>9</sup>     | 1063.390         | 1063.391      | 1.4              |
| c <sup>14</sup>    | 1561.670         | 1561.672      | 1.3              |
| c <sup>2</sup>     | 267.122          | 267.122       | 1.8              |
| c <sup>7</sup>     | 830.321          | 830.322       | 0.8              |
| c <sup>9</sup>     | 1080.416         | 1080.415      | -0.8             |
| x <sup>11</sup> +1 | 1203.590         | 1203.592      | 2.3              |
| x <sup>2</sup> +1  | 270.145          | 270.145       | 0.1              |
| x <sup>7</sup> +1  | 819.389          | 819.389       | 0.4              |
| x <sup>8</sup>     | 917.449          | 917.453       | 3.4              |
| y <sup>10</sup>    | 1075.555         | 1075.557      | 1.7              |
| y <sup>11</sup>    | 1176.603         | 1176.606      | 3.2              |
| y <sup>12</sup>    | 1273.655         | 1273.657      | 1.1              |
| y <sup>13</sup>    | 1360.687         | 1360.690      | 2.1              |
| y <sup>14</sup>    | 1523.751         | 1523.750      | -0.6             |
| y <sup>16</sup>    | 1721.851         | 1721.853      | 1.1              |
| y <sup>17</sup>    | 1888.850         | 1888.843      | -3.4             |
| y <sup>19</sup>    | 2086.950         | 2086.952      | 0.8              |
| y <sup>2</sup>     | 243.158          | 243.159       | 1.1              |
| y <sup>3</sup>     | 330.190          | 330.191       | 1.0              |
| y <sup>5</sup>     | 528.291          | 528.291       | 1.1              |
| y <sup>6</sup>     | 629.338          | 629.339       | 1.4              |
| y <sup>7</sup>     | 792.402          | 792.403       | 1.1              |
| y <sup>8</sup>     | 891.470          | 891.473       | 2.7              |
| y <sup>9</sup>     | 988.523          | 988.525       | 1.6              |
| z <sup>11</sup>    | 1160.584         | 1160.583      | -0.8             |
| z <sup>4</sup>     | 415.219          | 415.219       | -0.9             |
| z <sup>6</sup>     | 613.320          | 613.320       | 0.2              |
| z <sup>8</sup>     | 875.451          | 875.453       | 2.3              |

Supplementary Figure 4: Lists of fragment ions for peptides analyzed in Figure 1B by UVPD-MS for repeats 43,44 and 45. In each case, the 3+ charge state was selected, and UVPD was performed using 2 pulses (1.5 mJ per pulse). The identified site of phosphorylation is shaded in blue in the sequence map above each table.



46/48

N YLSLP|T|S|P|T|LY|S|P|T S P K C

| Identified Ions    | Theoretical Mass | Observed Mass | Mass Difference (ppm) |
|--------------------|------------------|---------------|-----------------------|
| a <sup>12</sup> +1 | 1321.535         | 1321.536      | 0.8                   |
| a <sup>9</sup> +1  | 956.437          | 956.437       | -0.1                  |
| a <sup>8</sup>     | 868.397          | 868.399       | 2.5                   |
| b <sup>4</sup>     | 448.196          | 448.196       | 1.2                   |
| b <sup>5</sup>     | 535.228          | 535.228       | 1.1                   |
| b <sup>8</sup>     | 896.392          | 896.390       | -1.4                  |
| c <sup>1</sup>     | 180.090          | 180.090       | 3.0                   |
| c <sup>2</sup>     | 267.122          | 267.122       | 2.3                   |
| c <sup>9</sup>     | 1000.450         | 1000.453      | 3.0                   |
| x <sup>12</sup> +1 | 1368.572         | 1368.583      | 7.9                   |
| x <sup>13</sup> +1 | 1455.604         | 1455.608      | 2.6                   |
| x <sup>5</sup> +1  | 635.244          | 635.245       | 0.7                   |
| x <sup>7</sup> +1  | 885.340          | 885.340       | 0.8                   |
| x <sup>8</sup> +1  | 986.387          | 986.384       | -3.2                  |
| x <sup>11</sup>    | 1270.512         | 1270.515      | 2.7                   |
| x <sup>6</sup>     | 721.268          | 721.269       | 1.2                   |
| y <sup>10</sup>    | 1143.485         | 1143.488      | 2.5                   |
| y <sup>11</sup>    | 1244.533         | 1244.535      | 1.5                   |
| y <sup>12</sup>    | 1341.585         | 1341.587      | 1.4                   |
| y <sup>2</sup>     | 243.158          | 243.159       | 1.6                   |
| y <sup>4</sup>     | 511.204          | 511.206       | 2.6                   |
| y <sup>5</sup>     | 608.257          | 608.258       | 0.8                   |
| y <sup>7</sup>     | 858.352          | 858.354       | 1.2                   |
| y <sup>8</sup>     | 959.400          | 959.403       | 3.4                   |
| y <sup>9</sup>     | 1056.453         | 1056.454      | 1.4                   |
| z <sup>11</sup>    | 1228.514         | 1228.516      | 1.9                   |
| z <sup>13</sup>    | 1412.599         | 1412.601      | 1.5                   |
| z <sup>4</sup>     | 495.186          | 495.186       | 0.4                   |
| z <sup>6</sup>     | 679.270          | 679.270       | 0.1                   |
| z <sup>8</sup>     | 943.381          | 943.383       | 2.0                   |

47/49

N YLSLP|T S P|T|LY|S|P|T|S|P|K C

| Identified Ions    | Theoretical Mass | Observed Mass | Mass Difference (ppm) |
|--------------------|------------------|---------------|-----------------------|
| a <sup>6</sup> +1  | 685.260          | 685.260       | -0.2                  |
| a <sup>9</sup> +1  | 1036.403         | 1036.401      | -1.5                  |
| a <sup>10</sup>    | 1132.448         | 1132.450      | 1.5                   |
| a <sup>12</sup>    | 1320.528         | 1320.526      | -0.9                  |
| a <sup>13</sup>    | 1417.580         | 1417.577      | -2.3                  |
| a <sup>8</sup>     | 948.363          | 948.361       | -2.5                  |
| b <sup>12</sup>    | 1348.522         | 1348.523      | 0.4                   |
| b <sup>7</sup>     | 813.295          | 813.295       | 0.1                   |
| b <sup>8</sup>     | 976.358          | 976.358       | 0.5                   |
| c <sup>11</sup>    | 1278.517         | 1278.517      | -0.1                  |
| c <sup>6</sup>     | 729.273          | 729.274       | 1.3                   |
| c <sup>8</sup>     | 993.384          | 993.386       | 1.5                   |
| x <sup>13</sup> +1 | 1455.604         | 1455.604      | -0.7                  |
| x <sup>4</sup> +1  | 458.225          | 458.225       | 0.4                   |
| x <sup>6</sup> +1  | 642.310          | 642.309       | -1.8                  |
| x <sup>10</sup>    | 1169.464         | 1169.463      | -1.3                  |
| x <sup>11</sup>    | 1270.512         | 1270.514      | 1.9                   |
| x <sup>4</sup>     | 457.217          | 457.217       | -0.1                  |
| x <sup>7</sup>     | 804.365          | 804.366       | 0.8                   |
| x <sup>8</sup>     | 905.413          | 905.414       | 1.1                   |
| y <sup>10</sup>    | 1143.485         | 1143.489      | 3.4                   |
| y <sup>11</sup>    | 1244.533         | 1244.532      | -0.9                  |
| y <sup>12</sup>    | 1341.585         | 1341.586      | 0.8                   |
| y <sup>13</sup>    | 1428.617         | 1428.619      | 1.4                   |
| y <sup>2</sup>     | 243.158          | 243.159       | 1.5                   |
| y <sup>3</sup>     | 330.190          | 330.191       | 1.1                   |
| y <sup>5</sup>     | 528.291          | 528.291       | 1.1                   |
| y <sup>6</sup>     | 615.323          | 615.324       | 1.5                   |
| y <sup>7</sup>     | 778.386          | 778.386       | 0.3                   |
| y <sup>8</sup>     | 879.434          | 879.436       | 2.7                   |
| y <sup>9</sup>     | 976.487          | 976.489       | 2.2                   |
| z <sup>11</sup>    | 1228.514         | 1228.516      | 1.7                   |
| z <sup>13</sup>    | 1412.599         | 1412.600      | 1.3                   |
| z <sup>4</sup>     | 415.219          | 415.219       | 0.1                   |
| z <sup>6</sup>     | 599.304          | 599.304       | 0.5                   |
| z <sup>8</sup>     | 863.415          | 863.416       | 1.3                   |

Supplementary Figure 5: Lists of fragment ions for peptides analyzed in Figure 1B by UVPD-MS for repeats 46/48 to 47/49. In each case, the 3+ charge state was selected, and UVPD was performed using 2 pulses (1.5 mJ per pulse). The identified site of phosphorylation is shaded in blue in the sequence map above each table.

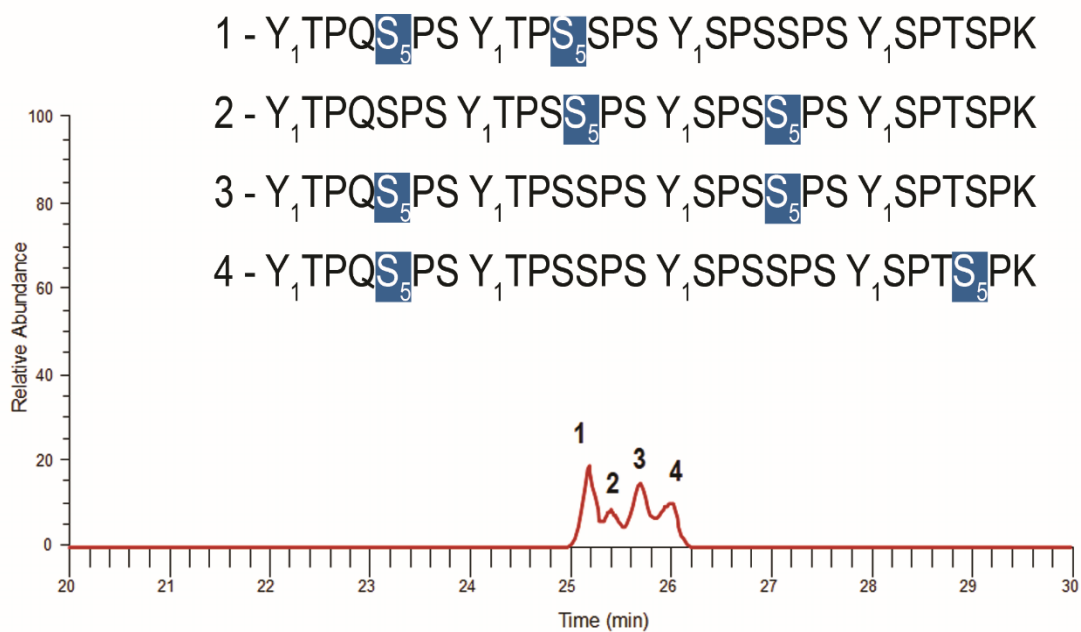

Supplementary Figure 6: LC-MS/MS trace obtained for doubly phosphorylated peptides of T4Q variation in human distal CTD. The peak numbers correspond to the indicated sites (blue highlights) of phosphorylation identified by MS/MS.

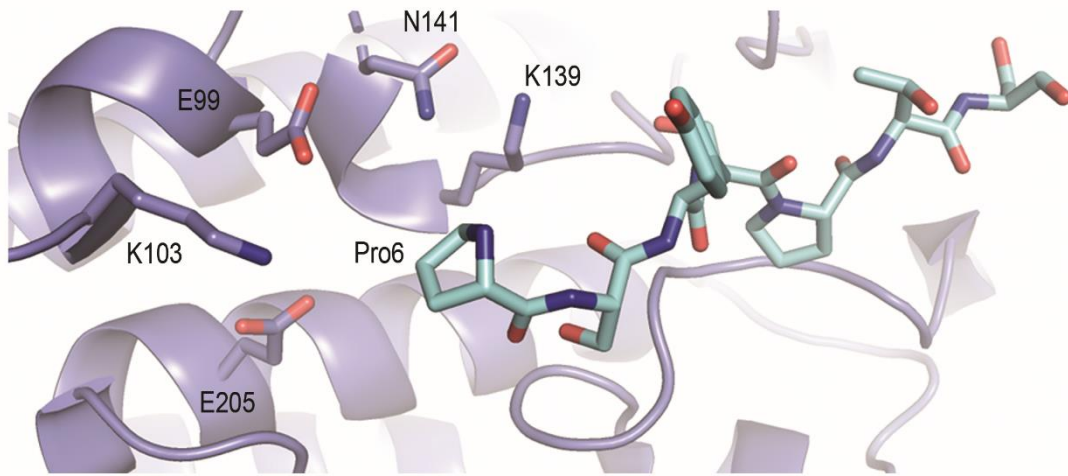

Supplementary Figure 7: The modeling of CTD with Ser2 in the active site places Pro6 in a hydrophilic environment.

2 G L P S G M L S P L K I V L S P I T L S P L K I V L S P T L S P L K I Y S 26  
 26 P L T

| Identified Ions    | Theoretical mass | Observed mass | Mass Difference (ppm) |
|--------------------|------------------|---------------|-----------------------|
| a <sup>+12</sup>   | 1118.530         | 1118.531      | 0.8                   |
| a <sup>+15</sup>   | 1403.663         | 1403.670      | 5.2                   |
| a <sup>+18</sup>   | 1781.853         | 1781.851      | -1.4                  |
| a <sup>+26</sup>   | 2719.248         | 2719.249      | 0.6                   |
| a <sup>+8</sup>    | 643.287          | 643.288       | 0.7                   |
| a <sup>+13</sup>   | 1218.570         | 1218.576      | 4.6                   |
| a <sup>+17</sup>   | 1693.813         | 1693.816      | 1.8                   |
| a <sup>+20</sup>   | 1978.946         | 1978.954      | 4.1                   |
| a <sup>+22</sup>   | 2163.031         | 2163.028      | -1.0                  |
| a <sup>+24</sup>   | 2454.189         | 2454.190      | 0.6                   |
| a <sup>+9</sup>    | 770.375          | 770.377       | 3.2                   |
| b <sup>+13</sup>   | 1246.565         | 1246.568      | 2.3                   |
| b <sup>+14</sup>   | 1333.597         | 1333.596      | -0.9                  |
| b <sup>+16</sup>   | 1558.745         | 1558.757      | 8.0                   |
| b <sup>+18</sup>   | 1808.840         | 1808.825      | -8.6                  |
| b <sup>+20</sup>   | 2006.941         | 2006.939      | -0.7                  |
| b <sup>+21</sup>   | 2093.973         | 2093.972      | -0.6                  |
| b <sup>+23</sup>   | 2319.121         | 2319.118      | -1.1                  |
| b <sup>+9</sup>    | 798.369          | 798.365       | -6.0                  |
| c <sup>+10</sup>   | 978.459          | 978.459       | -0.1                  |
| c <sup>+12</sup>   | 1162.544         | 1162.545      | 1.3                   |
| c <sup>+13</sup>   | 1263.592         | 1263.591      | -0.5                  |
| c <sup>+15</sup>   | 1447.676         | 1447.677      | 0.6                   |
| c <sup>+16</sup>   | 1575.771         | 1575.772      | 0.7                   |
| c <sup>+17</sup>   | 1738.835         | 1738.834      | -0.3                  |
| c <sup>+26</sup>   | 2763.261         | 2763.257      | -1.7                  |
| c <sup>+6</sup>    | 503.216          | 503.217       | 1.8                   |
| c <sup>+9</sup>    | 815.396          | 815.392       | -4.4                  |
| x <sup>+17</sup>   | 1929.840         | 1929.839      | -0.4                  |
| x <sup>+19</sup>   | 2220.998         | 2221.007      | 4.2                   |
| y <sup>+10</sup>   | 1143.485         | 1143.480      | -4.1                  |
| y <sup>+11</sup>   | 1306.548         | 1306.561      | 9.5                   |
| y <sup>+13-1</sup> | 1530.688         | 1530.682      | -4.1                  |
| y <sup>+14</sup>   | 1618.728         | 1618.722      | -3.8                  |
| y <sup>+16-1</sup> | 1815.821         | 1815.820      | -0.4                  |
| y <sup>+20</sup>   | 2292.072         | 2292.072      | 0.2                   |
| y <sup>+21</sup>   | 2379.104         | 2379.108      | 1.9                   |
| y <sup>+25</sup>   | 2711.219         | 2711.232      | 4.8                   |
| y <sup>+9-1</sup>  | 1055.445         | 1055.444      | -0.6                  |
| z <sup>+25</sup>   | 2695.200         | 2695.223      | 8.5                   |
| z <sup>+26</sup>   | 2792.253         | 2792.274      | 7.6                   |

3 G P G S G M S P L K I V L S P I T L S P L K I Y S 26  
 26 P L T

| Identified Ions    | Theoretical mass | Observed mass | Mass Difference (ppm) |
|--------------------|------------------|---------------|-----------------------|
| a <sup>+9</sup>    | 770.375          | 770.370       | -5.3                  |
| a <sup>+26</sup>   | 2718.240         | 2718.253      | 4.8                   |
| a <sup>+17</sup>   | 1693.813         | 1693.815      | 1.2                   |
| a <sup>+8+1</sup>  | 643.287          | 643.286       | -1.9                  |
| a <sup>+25+1</sup> | 2622.195         | 2622.199      | 1.3                   |
| a <sup>+22+1</sup> | 2244.005         | 2244.004      | -0.2                  |
| a <sup>+19+1</sup> | 1958.872         | 1958.874      | 0.8                   |
| a <sup>+18+1</sup> | 1861.820         | 1861.818      | -0.9                  |
| a <sup>+21+1</sup> | 2146.952         | 2146.963      | 5.3                   |
| a <sup>+11+1</sup> | 1021.478         | 1021.468      | -9.9                  |
| a <sup>+12+1</sup> | 1118.530         | 1118.531      | 0.1                   |
| b <sup>+14</sup>   | 1333.597         | 1333.595      | -1.9                  |
| b <sup>+11</sup>   | 1048.465         | 1048.464      | -0.7                  |
| b <sup>+21</sup>   | 2173.939         | 2173.934      | -2.3                  |
| b <sup>+23</sup>   | 2399.087         | 2399.076      | -4.4                  |
| c <sup>+13</sup>   | 1263.592         | 1263.585      | -4.9                  |
| c <sup>+12</sup>   | 1162.544         | 1162.544      | 0.4                   |
| c <sup>+19</sup>   | 2002.886         | 2002.879      | -3.2                  |
| x <sup>+17</sup>   | 1929.840         | 1929.839      | -0.4                  |
| x <sup>+19</sup>   | 2220.998         | 2221.005      | 3.0                   |
| y <sup>+6</sup>    | 691.354          | 691.354       | 0.3                   |
| y <sup>+7</sup>    | 778.386          | 778.388       | 2.1                   |
| y <sup>+10</sup>   | 1143.485         | 1143.482      | -2.8                  |
| y <sup>+13</sup>   | 1531.696         | 1531.693      | -1.9                  |
| y <sup>+16-1</sup> | 1815.821         | 1815.819      | -0.8                  |
| z <sup>+8</sup>    | 863.415          | 863.412       | -4.0                  |
| z <sup>+17</sup>   | 1887.842         | 1887.831      | -5.9                  |

4 G L P S G M L S P L K I V L S P I T L S P L K I Y S 26  
 26 P L T

| Identified Ions    | Theoretical mass | Observed mass | Mass Difference (ppm) |
|--------------------|------------------|---------------|-----------------------|
| a <sup>+26</sup>   | 2718.240         | 2718.252      | 4.2                   |
| a <sup>+17</sup>   | 1773.780         | 1773.781      | 0.9                   |
| a <sup>+24</sup>   | 2534.155         | 2534.160      | 2.0                   |
| a <sup>+22</sup>   | 2242.997         | 2243.000      | 1.5                   |
| a <sup>+12+1</sup> | 1198.497         | 1198.497      | -0.1                  |
| a <sup>+18+1</sup> | 1861.820         | 1861.824      | 2.6                   |
| a <sup>+19+1</sup> | 1958.872         | 1958.878      | 2.9                   |
| a <sup>+21+1</sup> | 2146.952         | 2146.954      | 1.0                   |
| b <sup>+25</sup>   | 2649.182         | 2649.191      | 3.4                   |
| b <sup>+9</sup>    | 798.369          | 798.364       | -6.7                  |
| b <sup>+21</sup>   | 2173.939         | 2173.946      | 3.4                   |
| c <sup>+19</sup>   | 2002.886         | 2002.875      | -5.6                  |
| c <sup>+10</sup>   | 978.459          | 978.460       | 1.1                   |
| x <sup>+19</sup>   | 2220.998         | 2221.012      | 6.4                   |
| x <sup>+8+1</sup>  | 906.421          | 906.415       | -6.8                  |
| y <sup>+6</sup>    | 691.354          | 691.354       | -0.8                  |
| y <sup>+7</sup>    | 778.386          | 778.388       | 2.6                   |
| y <sup>+9</sup>    | 976.487          | 976.486       | -1.1                  |
| y <sup>+13</sup>   | 1451.730         | 1451.727      | -1.5                  |
| y <sup>+21</sup>   | 2379.104         | 2379.105      | 0.7                   |
| y <sup>+24-1</sup> | 2653.190         | 2653.182      | -2.9                  |
| y <sup>+6-1</sup>  | 690.346          | 690.342       | -6.7                  |
| y <sup>+16-1</sup> | 1735.854         | 1735.852      | -1.2                  |
| z <sup>+17</sup>   | 1887.842         | 1887.843      | 0.5                   |
| z <sup>+26</sup>   | 2792.253         | 2792.267      | 5.1                   |

Supplementary Figure 8: Lists of fragment ions for mono-phosphorylated peptides (m/z of 956.11) analyzed in Figure 6A by UVPD-MS. In each case, the 3+ charge state was selected, and UVPD was performed using 2 pulses (1.5 mJ per pulse). The identified site of phosphorylation is shaded in blue in the sequence map above each table.



2 g p o s i o m s i p e l v i s i r i s i r i s i e l v i s

| Identified ions  | Theoretical mass | Observed mass | Mass Difference (ppm) |
|------------------|------------------|---------------|-----------------------|
| a <sup>1+1</sup> | 1022.425         | 1022.416      | -9.5                  |
| a <sup>1+1</sup> | 1119.478         | 1119.486      | 6.8                   |
| a <sup>1+1</sup> | 1404.611         | 1404.615      | 2.8                   |
| a <sup>1+1</sup> | 2374.943         | 2374.953      | 4.5                   |
| a <sup>2+1</sup> | 643.287          | 643.286       | -1.6                  |
| a <sup>10</sup>  | 934.385          | 934.383       | -3.1                  |
| a <sup>11</sup>  | 1219.518         | 1219.509      | -7.4                  |
| a <sup>12</sup>  | 1403.603         | 1403.61       | 5.2                   |
| a <sup>17</sup>  | 1695.709         | 1695.72       | 6.5                   |
| a <sup>21</sup>  | 2147.839         | 2147.839      | -0.2                  |
| a <sup>25</sup>  | 2624.039         | 2624.057      | 10                    |
| a <sup>26</sup>  | 2721.083         | 2721.107      | 8.8                   |
| b <sup>10</sup>  | 962.38           | 962.383       | 3                     |
| b <sup>11</sup>  | 1049.412         | 1049.417      | 4.5                   |
| b <sup>13</sup>  | 1247.513         | 1247.517      | 3.6                   |
| b <sup>14</sup>  | 1334.545         | 1334.551      | 4.3                   |
| b <sup>16</sup>  | 1560.64          | 1560.645      | 2.9                   |
| b <sup>17</sup>  | 1723.704         | 1723.708      | 2.3                   |
| b <sup>19</sup>  | 2088.802         | 2088.804      | 0.8                   |
| b <sup>21</sup>  | 2175.834         | 2175.843      | 4.1                   |
| b <sup>24</sup>  | 2564.993         | 2565.005      | 4.5                   |
| b <sup>25</sup>  | 2652.025         | 2652.035      | 3.8                   |
| b <sup>26</sup>  | 2739.057         | 2739.067      | 3.6                   |
| b <sup>27</sup>  | 2826.089         | 2826.099      | 3.5                   |
| b <sup>28</sup>  | 2913.121         | 2913.131      | 3.4                   |
| b <sup>29</sup>  | 3000.153         | 3000.163      | 3.3                   |
| b <sup>30</sup>  | 3087.185         | 3087.195      | 3.2                   |
| b <sup>31</sup>  | 3174.217         | 3174.227      | 3.1                   |
| b <sup>32</sup>  | 3261.249         | 3261.259      | 3.0                   |
| b <sup>33</sup>  | 3348.281         | 3348.291      | 2.9                   |
| b <sup>34</sup>  | 3435.313         | 3435.323      | 2.8                   |
| b <sup>35</sup>  | 3522.345         | 3522.355      | 2.7                   |
| b <sup>36</sup>  | 3609.377         | 3609.387      | 2.6                   |
| b <sup>37</sup>  | 3696.409         | 3696.419      | 2.5                   |
| b <sup>38</sup>  | 3783.441         | 3783.451      | 2.4                   |
| b <sup>39</sup>  | 3870.473         | 3870.483      | 2.3                   |
| b <sup>40</sup>  | 3957.505         | 3957.515      | 2.2                   |
| b <sup>41</sup>  | 4044.537         | 4044.547      | 2.1                   |
| b <sup>42</sup>  | 4131.569         | 4131.579      | 2.0                   |
| b <sup>43</sup>  | 4218.601         | 4218.611      | 1.9                   |
| b <sup>44</sup>  | 4305.633         | 4305.643      | 1.8                   |
| b <sup>45</sup>  | 4392.665         | 4392.675      | 1.7                   |
| b <sup>46</sup>  | 4479.697         | 4479.707      | 1.6                   |
| b <sup>47</sup>  | 4566.729         | 4566.739      | 1.5                   |
| b <sup>48</sup>  | 4653.761         | 4653.771      | 1.4                   |
| b <sup>49</sup>  | 4740.793         | 4740.803      | 1.3                   |
| b <sup>50</sup>  | 4827.825         | 4827.835      | 1.2                   |
| b <sup>51</sup>  | 4914.857         | 4914.867      | 1.1                   |
| b <sup>52</sup>  | 5001.889         | 5001.899      | 1.0                   |
| b <sup>53</sup>  | 5088.921         | 5088.931      | 0.9                   |
| b <sup>54</sup>  | 5175.953         | 5175.963      | 0.8                   |
| b <sup>55</sup>  | 5262.985         | 5262.995      | 0.7                   |
| b <sup>56</sup>  | 5350.017         | 5350.027      | 0.6                   |
| b <sup>57</sup>  | 5437.049         | 5437.059      | 0.5                   |
| b <sup>58</sup>  | 5524.081         | 5524.091      | 0.4                   |
| b <sup>59</sup>  | 5611.113         | 5611.123      | 0.3                   |
| b <sup>60</sup>  | 5698.145         | 5698.155      | 0.2                   |
| b <sup>61</sup>  | 5785.177         | 5785.187      | 0.1                   |
| b <sup>62</sup>  | 5872.209         | 5872.219      | 0.0                   |
| b <sup>63</sup>  | 5959.241         | 5959.251      | -0.1                  |
| b <sup>64</sup>  | 6046.273         | 6046.283      | -0.2                  |
| b <sup>65</sup>  | 6133.305         | 6133.315      | -0.3                  |
| b <sup>66</sup>  | 6220.337         | 6220.347      | -0.4                  |
| b <sup>67</sup>  | 6307.369         | 6307.379      | -0.5                  |
| b <sup>68</sup>  | 6394.401         | 6394.411      | -0.6                  |
| b <sup>69</sup>  | 6481.433         | 6481.443      | -0.7                  |
| b <sup>70</sup>  | 6568.465         | 6568.475      | -0.8                  |
| b <sup>71</sup>  | 6655.497         | 6655.507      | -0.9                  |
| b <sup>72</sup>  | 6742.529         | 6742.539      | -1.0                  |
| b <sup>73</sup>  | 6829.561         | 6829.571      | -1.1                  |
| b <sup>74</sup>  | 6916.593         | 6916.603      | -1.2                  |
| b <sup>75</sup>  | 7003.625         | 7003.635      | -1.3                  |
| b <sup>76</sup>  | 7090.657         | 7090.667      | -1.4                  |
| b <sup>77</sup>  | 7177.689         | 7177.699      | -1.5                  |
| b <sup>78</sup>  | 7264.721         | 7264.731      | -1.6                  |
| b <sup>79</sup>  | 7351.753         | 7351.763      | -1.7                  |
| b <sup>80</sup>  | 7438.785         | 7438.795      | -1.8                  |
| b <sup>81</sup>  | 7525.817         | 7525.827      | -1.9                  |
| b <sup>82</sup>  | 7612.849         | 7612.859      | -2.0                  |
| b <sup>83</sup>  | 7700.881         | 7700.891      | -2.1                  |
| b <sup>84</sup>  | 7787.913         | 7787.923      | -2.2                  |
| b <sup>85</sup>  | 7874.945         | 7874.955      | -2.3                  |
| b <sup>86</sup>  | 7961.977         | 7961.987      | -2.4                  |
| b <sup>87</sup>  | 8049.009         | 8049.019      | -2.5                  |
| b <sup>88</sup>  | 8136.041         | 8136.051      | -2.6                  |
| b <sup>89</sup>  | 8223.073         | 8223.083      | -2.7                  |
| b <sup>90</sup>  | 8310.105         | 8310.115      | -2.8                  |
| b <sup>91</sup>  | 8397.137         | 8397.147      | -2.9                  |
| b <sup>92</sup>  | 8484.169         | 8484.179      | -3.0                  |
| b <sup>93</sup>  | 8571.201         | 8571.211      | -3.1                  |
| b <sup>94</sup>  | 8658.233         | 8658.243      | -3.2                  |
| b <sup>95</sup>  | 8745.265         | 8745.275      | -3.3                  |
| b <sup>96</sup>  | 8832.297         | 8832.307      | -3.4                  |
| b <sup>97</sup>  | 8919.329         | 8919.339      | -3.5                  |
| b <sup>98</sup>  | 9006.361         | 9006.371      | -3.6                  |
| b <sup>99</sup>  | 9093.393         | 9093.403      | -3.7                  |
| b <sup>100</sup> | 9180.425         | 9180.435      | -3.8                  |
| b <sup>101</sup> | 9267.457         | 9267.467      | -3.9                  |
| b <sup>102</sup> | 9354.489         | 9354.499      | -4.0                  |
| b <sup>103</sup> | 9441.521         | 9441.531      | -4.1                  |
| b <sup>104</sup> | 9528.553         | 9528.563      | -4.2                  |
| b <sup>105</sup> | 9615.585         | 9615.595      | -4.3                  |
| b <sup>106</sup> | 9702.617         | 9702.627      | -4.4                  |
| b <sup>107</sup> | 9789.649         | 9789.659      | -4.5                  |
| b <sup>108</sup> | 9876.681         | 9876.691      | -4.6                  |
| b <sup>109</sup> | 9963.713         | 9963.723      | -4.7                  |
| b <sup>110</sup> | 10050.745        | 10050.755     | -4.8                  |
| b <sup>111</sup> | 10137.777        | 10137.787     | -4.9                  |
| b <sup>112</sup> | 10224.809        | 10224.819     | -5.0                  |
| b <sup>113</sup> | 10311.841        | 10311.851     | -5.1                  |
| b <sup>114</sup> | 10398.873        | 10398.883     | -5.2                  |
| b <sup>115</sup> | 10485.905        | 10485.915     | -5.3                  |
| b <sup>116</sup> | 10572.937        | 10572.947     | -5.4                  |
| b <sup>117</sup> | 10660.969        | 10660.979     | -5.5                  |
| b <sup>118</sup> | 10747.999        | 10748.009     | -5.6                  |
| b <sup>119</sup> | 10835.031        | 10835.041     | -5.7                  |
| b <sup>120</sup> | 10922.063        | 10922.073     | -5.8                  |
| b <sup>121</sup> | 11009.095        | 11009.105     | -5.9                  |
| b <sup>122</sup> | 11096.127        | 11096.137     | -6.0                  |
| b <sup>123</sup> | 11183.159        | 11183.169     | -6.1                  |
| b <sup>124</sup> | 11270.191        | 11270.201     | -6.2                  |
| b <sup>125</sup> | 11357.223        | 11357.233     | -6.3                  |
| b <sup>126</sup> | 11444.255        | 11444.265     | -6.4                  |
| b <sup>127</sup> | 11531.287        | 11531.297     | -6.5                  |
| b <sup>128</sup> | 11618.319        | 11618.329     | -6.6                  |
| b <sup>129</sup> | 11705.351        | 11705.361     | -6.7                  |
| b <sup>130</sup> | 11792.383        | 11792.393     | -6.8                  |
| b <sup>131</sup> | 11879.415        | 11879.425     | -6.9                  |
| b <sup>132</sup> | 11966.447        | 11966.457     | -7.0                  |
| b <sup>133</sup> | 12053.479        | 12053.489     | -7.1                  |
| b <sup>134</sup> | 12140.511        | 12140.521     | -7.2                  |
| b <sup>135</sup> | 12227.543        | 12227.553     | -7.3                  |
| b <sup>136</sup> | 12314.575        | 12314.585     | -7.4                  |
| b <sup>137</sup> | 12401.607        | 12401.617     | -7.5                  |
| b <sup>138</sup> | 12488.639        | 12488.649     | -7.6                  |
| b <sup>139</sup> | 12575.671        | 12575.681     | -7.7                  |
| b <sup>140</sup> | 12662.703        | 12662.713     | -7.8                  |
| b <sup>141</sup> | 12749.735        | 12749.745     | -7.9                  |
| b <sup>142</sup> | 12836.767        | 12836.777     | -8.0                  |
| b <sup>143</sup> | 12923.799        | 12923.809     | -8.1                  |
| b <sup>144</sup> | 13010.831        | 13010.841     | -8.2                  |
| b <sup>145</sup> | 13097.863        | 13097.873     | -8.3                  |
| b <sup>146</sup> | 13184.895        | 13184.905     | -8.4                  |
| b <sup>147</sup> | 13271.927        | 13271.937     | -8.5                  |
| b <sup>148</sup> | 13358.959        | 13358.969     | -8.6                  |
| b <sup>149</sup> | 13445.991        | 13446.001     | -8.7                  |
| b <sup>150</sup> | 13533.023        | 13533.033     | -8.8                  |
| b <sup>151</sup> | 13620.055        | 13620.065     | -8.9                  |
| b <sup>152</sup> | 13707.087        | 13707.097     | -9.0                  |
| b <sup>153</sup> | 13794.119        | 13794.129     | -9.1                  |
| b <sup>154</sup> | 13881.151        | 13881.161     | -9.2                  |
| b <sup>155</sup> | 13968.183        | 13968.193     | -9.3                  |
| b <sup>156</sup> | 14055.215        | 14055.225     | -9.4                  |
| b <sup>157</sup> | 14142.247        | 14142.257     | -9.5                  |
| b <sup>158</sup> | 14229.279        | 14229.289     | -9.6                  |
| b <sup>159</sup> | 14316.311        | 14316.321     | -9.7                  |
| b <sup>160</sup> | 14403.343        | 14403.353     | -9.8                  |
| b <sup>161</sup> | 14490.375        | 14490.385     | -9.9                  |
| b <sup>162</sup> | 14577.407        | 14577.417     | -10.0                 |
| b <sup>163</sup> | 14664.439        | 14664.449     | -10.1                 |
| b <sup>164</sup> | 14751.471        | 14751.481     | -10.2                 |
| b <sup>165</sup> | 14838.503        | 14838.513     | -10.3                 |
| b <sup>166</sup> | 14925.535        | 14925.545     | -10.4                 |
| b <sup>167</sup> | 15012.567        | 15012.577     | -10.5                 |
| b <sup>168</sup> | 15099.599        | 15099.609     | -10.6                 |
| b <sup>169</sup> | 15186.631        | 15186.641     | -10.7                 |
| b <sup>170</sup> | 15273.663        | 15273.673     | -10.8                 |
| b <sup>171</sup> | 15360.695        | 15360.705     | -10.9                 |
| b <sup>172</sup> | 15447.727        | 15447.737     | -11.0                 |
| b <sup>173</sup> | 15534.759        | 15534.769     | -11.1                 |
| b <sup>174</sup> | 15621.791        | 15621.801     | -11.2                 |
| b <sup>175</sup> | 15708.823        | 15708.833     | -11.3                 |
| b <sup>176</sup> | 15795.855        | 15795.865     | -11.4                 |
| b <sup>177</sup> | 15882.887        | 15882.897     | -11.5                 |
| b <sup>178</sup> | 15969.919        | 15969.929     | -11.6                 |
| b <sup>179</sup> | 16056.951        | 16056.961     | -11.7                 |
| b <sup>180</sup> | 16143.983        | 16143.993     | -11.8                 |
| b <sup>181</sup> | 16231.015        | 16231.025     | -11.9                 |
| b <sup>182</sup> | 16318.047        | 16318.057     | -12.0                 |
| b <sup>183</sup> | 16405.079        | 16405.089     | -12.1                 |
| b <sup>184</sup> | 16492.111        | 16492.121     | -12.2                 |
| b <sup>185</sup> | 16579.143        | 16579.153     | -12.3                 |
| b <sup>186</sup> | 16666.175        | 16666.185     | -12.4                 |
| b <sup>187</sup> | 16753.207        | 16753.217     | -12.5                 |
| b <sup>188</sup> | 16840.239        | 16840.249     | -12.6                 |
| b <sup>189</sup> | 16927.271        | 16927.281     | -12.7                 |
| b <sup>190</sup> | 17014.303        | 17014.313     | -12.8                 |
| b <sup>191</sup> | 17101.335        | 17101.345     | -12.9                 |
| b <sup>192</sup> | 17188.367        | 17188.377     | -13.0                 |
| b <sup>193</sup> | 17275.399        | 17275.409     | -13.1                 |
| b <sup>194</sup> | 17362.431        | 17362.441     | -13.2                 |
| b <sup>195</sup> | 17449.463        | 17449.473     | -13.3                 |
| b <sup>196</sup> | 17536.495        | 17536.505     | -13.4                 |
| b <sup>197</sup> | 17623.527        | 17623.537     | -13.5                 |
| b <sup>198</sup> | 17710.559        | 17710.569     | -13.6                 |
| b <sup>199</sup> | 17797.591        | 17797.601     | -13.7                 |
| b <sup>200</sup> | 17884.623        | 17884.633     | -13.8                 |
| b <sup>201</sup> | 17971.655        | 17971.665     | -13.9                 |
| b <sup>202</sup> | 18058.687        | 18058.697     | -14.0                 |
| b <sup>203</sup> | 18145.719        | 18145.729     | -14.1                 |
| b <sup>204</sup> | 18232.751        | 18232.761     | -14.2                 |
| b <sup>205</sup> | 18319.783        | 18319.793     | -14.3                 |
| b <sup>206</sup> | 18406.815        | 18406.825     | -14.4                 |
| b <sup>207</sup> | 18493.847        | 18493.857     | -14.5                 |
| b <sup>208</sup> | 18580.879        | 18580.889     | -14.6                 |
| b <sup>209</sup> | 18667.911        | 18667.921     | -14.7                 |
| b <sup>210</sup> | 18754.943        | 18754.953     | -14.8                 |
| b <sup>211</sup> | 18841.975        | 18841.985     | -14.9                 |
| b <sup>212</sup> | 18929.007        | 18929.017     | -15.0                 |
| b <sup>213</sup> | 19016.039        | 19016.049     | -15.1                 |
| b <sup>214</sup> | 19103.071        | 19103.081     | -15.2                 |
| b <sup>215</sup> | 19190.103        | 19190.113     | -15.3                 |
| b <sup>216</sup> | 19277.135        | 19277.145     | -15.4                 |
| b <sup>217</sup> | 19364.167        | 19364.177     | -15.5                 |
| b <sup>218</sup> | 19451.199        | 19451.209     | -15.6                 |
| b <sup>219</sup> | 19538.231        | 19538.241     | -15.7                 |
| b <sup>220</sup> | 19625.263        | 19625.273     | -15.8                 |
| b <sup>221</sup> | 19712.295        | 19712.305     | -15.9                 |
| b <sup>222</sup> | 19800.327        | 19800.337     | -16.0                 |
| b <sup>223</sup> | 19887.359        | 19887.369     | -16.1                 |
| b <sup>224</sup> | 19974.391        | 19974.401     | -16.2                 |
| b <sup>225</sup> | 20061.423        | 20061.433     | -16.3                 |
| b <sup>226</sup> | 20148.455        | 20148.465     | -16.4                 |
| b <sup>227</sup> | 20235.487        | 20235.497     | -16.5                 |
| b <sup>228</sup> | 20322.519        | 20322.529     | -16.6                 |
| b <sup>229</sup> | 20409.551        | 20409.561     | -16.7                 |
| b <sup>230</sup> | 20496.583        | 20496.593     | -16.8                 |
| b <sup>231</sup> | 20583.615        | 20583.625     | -16.9                 |
| b <sup>232</sup> | 20670.647        | 20670.657     | -17.0                 |
| b <sup>233</sup> | 20757.679        | 20757.689     | -17.1                 |
| b <sup>234</sup> | 20844.711        | 20844.721     | -1                    |

2 G P G S G M S I P E L V I S P I T S I P S I V P I T S I P L E I V S P  
P T

| Identified Ions    | Theoretical Mass | Observed Mass | Mass Difference (ppm) |
|--------------------|------------------|---------------|-----------------------|
| a <sup>11</sup> +1 | 1022.425         | 1022.426      | 0.6                   |
| a <sup>15</sup> +1 | 1404.611         | 1404.613      | 2.0                   |
| a <sup>19</sup> +1 | 1918.757         | 1918.762      | 2.6                   |
| a <sup>21</sup> +1 | 2106.837         | 2106.840      | 1.5                   |
| a <sup>22</sup> +1 | 2203.889         | 2203.897      | 3.2                   |
| a <sup>26</sup> +1 | 2680.080         | 2680.093      | 4.9                   |
| a <sup>6</sup> +1  | 459.203          | 459.204       | 3.4                   |
| a <sup>8</sup> +1  | 643.287          | 643.290       | 4.4                   |
| a <sup>9</sup> +1  | 772.330          | 772.332       | 2.9                   |
| a <sup>12</sup>    | 1118.470         | 1118.461      | -8.4                  |
| a <sup>15</sup>    | 1403.603         | 1403.608      | 3.5                   |
| a <sup>17</sup>    | 1653.698         | 1653.703      | 3.0                   |
| a <sup>9</sup>     | 771.322          | 771.322       | -0.2                  |
| b <sup>10</sup>    | 962.380          | 962.382       | 2.1                   |
| b <sup>11</sup>    | 1049.412         | 1049.415      | 2.5                   |
| b <sup>13</sup>    | 1247.513         | 1247.516      | 2.8                   |
| b <sup>14</sup>    | 1334.545         | 1334.551      | 4.4                   |
| b <sup>16</sup>    | 1518.630         | 1518.637      | 5.0                   |
| b <sup>17</sup>    | 1681.693         | 1681.699      | 3.6                   |
| b <sup>20</sup>    | 2046.792         | 2046.810      | 8.8                   |
| b <sup>21</sup>    | 2133.824         | 2133.831      | 3.2                   |
| b <sup>23</sup>    | 2359.919         | 2359.930      | 4.7                   |
| b <sup>24</sup>    | 2522.983         | 2522.994      | 4.4                   |
| b <sup>26</sup>    | 2707.067         | 2707.086      | 7.0                   |
| b <sup>6</sup>     | 486.190          | 486.191       | 3.4                   |
| c <sup>13</sup>    | 1264.539         | 1264.531      | -6.6                  |
| c <sup>16</sup>    | 1535.656         | 1535.662      | 3.9                   |
| c <sup>23</sup>    | 2376.945         | 2376.948      | 1.0                   |
| c <sup>6</sup>     | 503.216          | 503.217       | 2.8                   |
| c <sup>9</sup>     | 816.343          | 816.346       | 3.8                   |
| x <sup>19</sup> +1 | 2182.838         | 2182.840      | 0.8                   |
| x <sup>23</sup> +1 | 2554.985         | 2554.981      | -1.5                  |
| x <sup>4</sup> +1  | 493.193          | 493.195       | 2.7                   |
| y <sup>10</sup>    | 1144.433         | 1144.437      | 4.1                   |
| y <sup>12</sup>    | 1394.528         | 1394.539      | 7.8                   |
| y <sup>13</sup>    | 1491.581         | 1491.585      | 2.8                   |
| y <sup>13</sup> -1 | 1490.573         | 1490.568      | -3.2                  |
| y <sup>14</sup>    | 1578.613         | 1578.618      | 3.1                   |
| y <sup>16</sup>    | 1776.713         | 1776.719      | 3.5                   |
| y <sup>16</sup> -1 | 1775.705         | 1775.710      | 2.5                   |
| y <sup>17</sup>    | 1863.745         | 1863.753      | 4.3                   |
| y <sup>18</sup>    | 2026.808         | 2026.809      | 0.2                   |
| y <sup>20</sup> -1 | 2251.896         | 2251.904      | 3.6                   |
| y <sup>21</sup>    | 2339.936         | 2339.947      | 5.0                   |
| y <sup>3</sup>     | 303.143          | 303.144       | 2.8                   |
| y <sup>4</sup>     | 466.206          | 466.208       | 3.3                   |
| y <sup>5</sup>     | 595.249          | 595.250       | 2.2                   |
| y <sup>6</sup>     | 692.302          | 692.304       | 3.4                   |
| y <sup>7</sup>     | 779.334          | 779.337       | 4.0                   |
| y <sup>9</sup>     | 977.434          | 977.437       | 3.0                   |
| z <sup>18</sup>    | 2010.790         | 2010.807      | 8.6                   |

3 G P G S G M S I P E L V I S P I T S I P S I P T S I P L E I V S P  
P T

| Identified Ionsx   | Theoretical Mass | Observed Mass | Mass Difference (ppm) |
|--------------------|------------------|---------------|-----------------------|
| a <sup>11</sup> +1 | 1022.425         | 1022.426      | 0.6                   |
| a <sup>12</sup> +1 | 1119.478         | 1119.479      | 0.5                   |
| a <sup>18</sup> +1 | 1821.704         | 1821.706      | 0.8                   |
| a <sup>21</sup> +1 | 2106.837         | 2106.847      | 4.9                   |
| a <sup>22</sup> +1 | 2203.889         | 2203.895      | 2.4                   |
| a <sup>26</sup> +1 | 2680.080         | 2680.087      | 2.6                   |
| a <sup>10</sup>    | 934.385          | 934.391       | 5.8                   |
| a <sup>13</sup>    | 1219.518         | 1219.520      | 2.0                   |
| a <sup>14</sup>    | 1386.516         | 1386.520      | 2.8                   |
| a <sup>25</sup>    | 2582.020         | 2582.030      | 3.9                   |
| b <sup>10</sup>    | 962.380          | 962.383       | 3.2                   |
| b <sup>11</sup>    | 1049.412         | 1049.416      | 3.7                   |
| b <sup>13</sup>    | 1247.513         | 1247.517      | 3.5                   |
| b <sup>16</sup>    | 1598.596         | 1598.586      | -6.2                  |
| b <sup>17</sup>    | 1761.659         | 1761.668      | 5.2                   |
| b <sup>18</sup>    | 1848.691         | 1848.700      | 4.6                   |
| b <sup>20</sup>    | 2046.792         | 2046.805      | 6.3                   |
| b <sup>21</sup>    | 2133.824         | 2133.830      | 3.1                   |
| b <sup>24</sup>    | 2522.983         | 2522.995      | 4.8                   |
| b <sup>4</sup>     | 298.128          | 298.129       | 5.3                   |
| b <sup>6</sup>     | 486.190          | 486.191       | 3.3                   |
| c <sup>16</sup>    | 1615.622         | 1615.630      | 4.5                   |
| c <sup>23</sup>    | 2376.945         | 2376.951      | 2.3                   |
| c <sup>6</sup>     | 503.216          | 503.219       | 5.4                   |
| c <sup>9</sup>     | 816.343          | 816.347       | 4.3                   |
| x <sup>16</sup> +1 | 1803.700         | 1803.695      | -3.0                  |
| x <sup>23</sup> +1 | 2554.985         | 2554.981      | -1.6                  |
| y <sup>10</sup>    | 1064.466         | 1064.471      | 4.7                   |
| y <sup>11</sup>    | 1227.530         | 1227.533      | 2.9                   |
| y <sup>12</sup>    | 1314.562         | 1314.560      | -0.8                  |
| y <sup>13</sup>    | 1411.614         | 1411.621      | 4.4                   |
| y <sup>14</sup>    | 1578.613         | 1578.621      | 5.0                   |
| y <sup>16</sup>    | 1776.713         | 1776.720      | 3.8                   |
| y <sup>17</sup>    | 1863.745         | 1863.754      | 4.8                   |
| y <sup>20</sup> -1 | 2251.896         | 2251.903      | 3.3                   |
| y <sup>21</sup>    | 2339.936         | 2339.949      | 5.4                   |
| y <sup>23</sup> -1 | 2526.990         | 2527.006      | 6.3                   |
| y <sup>3</sup>     | 303.143          | 303.144       | 3.0                   |
| y <sup>4</sup>     | 466.206          | 466.208       | 4.4                   |
| y <sup>5</sup>     | 595.249          | 595.251       | 3.5                   |
| y <sup>6</sup>     | 692.302          | 692.304       | 3.5                   |
| y <sup>7</sup>     | 779.334          | 779.337       | 4.6                   |
| y <sup>9</sup>     | 977.434          | 977.438       | 3.4                   |
| z <sup>18</sup>    | 2010.790         | 2010.808      | 9.2                   |

4 G P G S G M S I P E L V I S P I T S I P S I P T S I P L E I V S P  
P T

| Identified Ionsx   | Theoretical Mass | Observed Mass | Mass Difference (ppm) |
|--------------------|------------------|---------------|-----------------------|
| a <sup>18</sup> +1 | 1821.704         | 1821.692      | -6.7                  |
| a <sup>22</sup> +1 | 2203.889         | 2203.900      | 4.7                   |
| a <sup>23</sup> +1 | 2332.932         | 2332.950      | 7.5                   |
| a <sup>17</sup>    | 1733.664         | 1733.672      | 4.2                   |
| a <sup>21</sup>    | 2105.829         | 2105.831      | 1.1                   |
| a <sup>25</sup>    | 2582.020         | 2582.030      | 3.9                   |
| b <sup>10</sup>    | 1042.347         | 1042.349      | 2.1                   |
| b <sup>11</sup>    | 1129.379         | 1129.381      | 2.1                   |
| b <sup>13</sup>    | 1327.479         | 1327.488      | 6.6                   |
| b <sup>14</sup>    | 1414.511         | 1414.514      | 2.0                   |
| b <sup>17</sup>    | 1761.659         | 1761.663      | 2.2                   |
| b <sup>18</sup>    | 1848.691         | 1848.701      | 5.0                   |
| b <sup>20</sup>    | 2046.792         | 2046.802      | 5.2                   |
| b <sup>21</sup>    | 2133.824         | 2133.829      | 2.3                   |
| b <sup>23</sup>    | 2359.919         | 2359.940      | 8.7                   |
| b <sup>24</sup>    | 2522.983         | 2522.992      | 3.6                   |
| b <sup>25</sup>    | 2610.015         | 2610.026      | 4.3                   |
| b <sup>6</sup>     | 486.190          | 486.191       | 3.4                   |
| c <sup>13</sup>    | 1344.505         | 1344.505      | -0.3                  |
| c <sup>16</sup>    | 1615.622         | 1615.629      | 4.0                   |
| c <sup>24</sup>    | 2540.009         | 2540.011      | 0.8                   |
| c <sup>9</sup>     | 896.310          | 896.312       | 3.1                   |
| y <sup>10</sup>    | 1064.466         | 1064.470      | 3.6                   |
| y <sup>11</sup>    | 1227.530         | 1227.533      | 2.9                   |
| y <sup>12</sup>    | 1314.562         | 1314.549      | -9.4                  |
| y <sup>13</sup>    | 1411.614         | 1411.621      | 4.7                   |
| y <sup>13</sup> -1 | 1410.607         | 1410.615      | 5.9                   |
| y <sup>14</sup>    | 1498.646         | 1498.654      | 5.0                   |
| y <sup>16</sup>    | 1696.747         | 1696.743      | -2.0                  |
| y <sup>17</sup>    | 1783.779         | 1783.785      | 3.7                   |
| y <sup>20</sup> -1 | 2171.930         | 2171.936      | 3.0                   |
| y <sup>21</sup>    | 2339.936         | 2339.949      | 5.7                   |
| y <sup>3</sup>     | 303.143          | 303.144       | 2.9                   |
| y <sup>3</sup>     | 303.143          | 303.144       | 2.9                   |
| y <sup>4</sup>     | 466.206          | 466.207       | 2.2                   |
| y <sup>4</sup>     | 466.206          | 466.207       | 2.2                   |
| y <sup>6</sup>     | 692.302          | 692.304       | 3.7                   |
| y <sup>7</sup>     | 779.334          | 779.337       | 3.7                   |
| y <sup>9</sup>     | 977.434          | 977.437       | 3.4                   |

Supplementary Figure 10: Lists of fragment ions for mono-phosphorylated peptides (m/z of 943.40) analyzed in Figure 6C by UVPD-MS. In each case, the 3+ charge state was selected, and UVPD was performed using 2 pulses (1.5 mJ per pulse). The identified site of phosphorylation is shaded in blue in the sequence map above each table.

2

G P G S G M S (P) S (V) S (P) T (S) P (E) V (S) P T (S) P S (Y) S (S) (P) T

| Identified Ions    | Theoretical mass | Observed mass | Mass Difference (ppm) |
|--------------------|------------------|---------------|-----------------------|
| a <sup>12</sup> +1 | 1077.468         | 1077.475      | 6.8                   |
| a <sup>15</sup> +1 | 1362.600         | 1362.606      | 4.6                   |
| a <sup>26</sup> +1 | 2638.070         | 2638.077      | 2.9                   |
| a <sup>8</sup> +1  | 643.287          | 643.290       | 4.0                   |
| a <sup>11</sup>    | 979.407          | 979.409       | 1.7                   |
| a <sup>13</sup>    | 1177.507         | 1177.500      | -6.0                  |
| a <sup>17</sup>    | 1653.698         | 1653.705      | 4.3                   |
| a <sup>18</sup>    | 1740.730         | 1740.739      | 5.4                   |
| a <sup>25</sup>    | 2540.009         | 2540.023      | 5.4                   |
| b <sup>10</sup>    | 920.370          | 920.374       | 4.1                   |
| b <sup>11</sup>    | 1007.402         | 1007.406      | 4.3                   |
| b <sup>13</sup>    | 1205.502         | 1205.507      | 4.0                   |
| b <sup>14</sup>    | 1292.534         | 1292.540      | 4.3                   |
| b <sup>15</sup>    | 1389.587         | 1389.591      | 3.0                   |
| b <sup>16</sup>    | 1518.630         | 1518.637      | 4.5                   |
| b <sup>17</sup>    | 1681.693         | 1681.699      | 3.8                   |
| b <sup>18</sup>    | 1768.725         | 1768.733      | 4.3                   |
| b <sup>20</sup>    | 1966.825         | 1966.835      | 4.7                   |
| b <sup>21</sup>    | 2053.857         | 2053.866      | 3.9                   |
| b <sup>23</sup>    | 2237.942         | 2237.958      | 6.9                   |
| b <sup>24</sup>    | 2401.006         | 2401.016      | 4.1                   |
| b <sup>25</sup>    | 2568.004         | 2568.017      | 5.2                   |
| b <sup>6</sup>     | 486.190          | 486.191       | 3.6                   |
| b <sup>7</sup>     | 573.222          | 573.224       | 3.6                   |
| b <sup>9</sup>     | 757.306          | 757.311       | 5.6                   |
| c <sup>10</sup>    | 937.396          | 937.399       | 3.0                   |
| c <sup>13</sup>    | 1222.529         | 1222.531      | 1.7                   |
| c <sup>16</sup>    | 1535.656         | 1535.663      | 4.5                   |
| c <sup>6</sup>     | 503.216          | 503.218       | 3.1                   |
| c <sup>9</sup>     | 774.333          | 774.336       | 4.3                   |
| x <sup>19</sup> +1 | 2140.828         | 2140.834      | 3.0                   |
| y <sup>10</sup>    | 1102.422         | 1102.427      | 4.4                   |
| y <sup>11</sup>    | 1265.485         | 1265.494      | 7.2                   |
| y <sup>13</sup>    | 1491.581         | 1491.586      | 3.8                   |
| y <sup>13</sup> -1 | 1490.573         | 1490.565      | -5.3                  |
| y <sup>14</sup>    | 1578.613         | 1578.617      | 2.9                   |
| y <sup>16</sup>    | 1776.713         | 1776.719      | 3.5                   |
| y <sup>17</sup>    | 1863.745         | 1863.749      | 2.3                   |
| y <sup>20</sup>    | 2210.893         | 2210.898      | 2.1                   |
| y <sup>4</sup>     | 546.173          | 546.175       | 4.3                   |
| y <sup>6</sup>     | 730.257          | 730.260       | 3.1                   |
| y <sup>7</sup>     | 817.290          | 817.292       | 3.5                   |
| y <sup>9</sup>     | 1015.390         | 1015.394      | 3.7                   |

3

G P G S G M S (P) S (V) S (P) T (S) P (E) V (S) P T (S) P S (Y) S (S) (P) T

| Identified Ions    | Theoretical mass | Observed mass | Mass Difference (ppm) |
|--------------------|------------------|---------------|-----------------------|
| a <sup>11</sup> +1 | 1060.381         | 1060.382      | 0.5                   |
| a <sup>14</sup> +1 | 1345.514         | 1345.506      | -5.8                  |
| a <sup>15</sup> +1 | 1442.566         | 1442.574      | 5.6                   |
| a <sup>16</sup> +1 | 1571.609         | 1571.611      | 1.2                   |
| a <sup>18</sup> +1 | 1821.704         | 1821.707      | 1.2                   |
| a <sup>19</sup> +1 | 1918.757         | 1918.766      | 4.4                   |
| a <sup>21</sup> +1 | 2106.837         | 2106.839      | 1.0                   |
| a <sup>26</sup> +1 | 2638.070         | 2638.079      | 3.6                   |
| a <sup>6</sup> +1  | 459.203          | 459.206       | 7.7                   |
| a <sup>8</sup> +1  | 643.287          | 643.289       | 2.5                   |
| a <sup>13</sup>    | 1257.474         | 1257.482      | 6.6                   |
| a <sup>17</sup>    | 1733.664         | 1733.678      | 7.7                   |
| a <sup>25</sup>    | 2540.009         | 2540.017      | 3.2                   |
| b <sup>10</sup>    | 920.370          | 920.373       | 3.3                   |
| b <sup>14</sup>    | 1372.501         | 1372.506      | 3.8                   |
| b <sup>16</sup>    | 1598.596         | 1598.598      | 1.0                   |
| b <sup>17</sup>    | 1761.659         | 1761.666      | 3.6                   |
| b <sup>18</sup>    | 1848.691         | 1848.697      | 3.3                   |
| b <sup>21</sup>    | 2133.824         | 2133.830      | 3.0                   |
| b <sup>24</sup>    | 2480.972         | 2480.979      | 2.7                   |
| b <sup>25</sup>    | 2568.004         | 2568.015      | 4.1                   |
| b <sup>26</sup>    | 2665.057         | 2665.076      | 7.0                   |
| b <sup>6</sup>     | 486.190          | 486.191       | 3.0                   |
| b <sup>9</sup>     | 757.306          | 757.308       | 2.6                   |
| c <sup>13</sup>    | 1302.495         | 1302.500      | 4.1                   |
| c <sup>16</sup>    | 1615.622         | 1615.628      | 3.7                   |
| c <sup>8</sup>     | 687.301          | 687.306       | 8.0                   |
| c <sup>9</sup>     | 774.333          | 774.335       | 3.3                   |
| x <sup>9</sup> +1  | 962.411          | 962.417       | 6.3                   |
| x <sup>8</sup>     | 864.350          | 864.351       | 0.6                   |
| y <sup>10</sup>    | 1022.456         | 1022.460      | 4.0                   |
| y <sup>11</sup>    | 1185.519         | 1185.525      | 5.3                   |
| y <sup>13</sup>    | 1411.614         | 1411.619      | 3.4                   |
| y <sup>14</sup>    | 1498.646         | 1498.650      | 2.5                   |
| y <sup>16</sup> -1 | 1695.739         | 1695.741      | 1.2                   |
| y <sup>17</sup>    | 1863.745         | 1863.749      | 2.0                   |
| y <sup>20</sup>    | 2210.893         | 2210.898      | 2.1                   |
| y <sup>21</sup>    | 2297.925         | 2297.935      | 4.3                   |
| y <sup>3</sup>     | 303.143          | 303.144       | 2.6                   |
| y <sup>6</sup>     | 650.291          | 650.293       | 3.4                   |
| y <sup>7</sup>     | 737.323          | 737.326       | 3.4                   |
| y <sup>8</sup>     | 838.371          | 838.373       | 2.0                   |
| y <sup>9</sup>     | 935.424          | 935.427       | 3.3                   |
| y <sup>9</sup> -1  | 934.416          | 934.420       | 4.6                   |
| z <sup>19</sup>    | 2097.822         | 2097.816      | -3.0                  |

Supplementary Figure 11: Lists of fragment ions for mono-phosphorylated peptides (m/z of 929.39) analyzed in Figure 6D by UVPD-MS. In each case, the 3+ charge state was selected, and UVPD was performed using 2 pulses (1.5 mJ per pulse). The identified site of phosphorylation is shaded in blue in the sequence map above each table.

2 G P G S G M L S P S I V I E L P I T S I S P I S V I L E P T S P S I V I L E 26  
 20]P T

| Identified Ions    | Theoretical mass | Observed mass | Mass Difference (ppm) |
|--------------------|------------------|---------------|-----------------------|
| a <sup>10</sup> +1 | 893.383          | 893.384       | 1.1                   |
| a <sup>11</sup> +1 | 1022.425         | 1022.427      | 1.3                   |
| a <sup>13</sup>    | 1219.518         | 1219.507      | -9.3                  |
| b <sup>10</sup>    | 920.370          | 920.372       | 2.4                   |
| b <sup>11</sup>    | 1049.412         | 1049.415      | 2.9                   |
| b <sup>12</sup>    | 1146.465         | 1146.463      | -1.7                  |
| b <sup>13</sup>    | 1247.513         | 1247.517      | 3.1                   |
| b <sup>14</sup>    | 1334.545         | 1334.550      | 4.1                   |
| b <sup>15</sup>    | 1431.598         | 1431.603      | 3.7                   |
| b <sup>16</sup>    | 1518.630         | 1518.637      | 4.8                   |
| b <sup>17</sup>    | 1681.693         | 1681.700      | 3.9                   |
| b <sup>18</sup>    | 1810.736         | 1810.742      | 3.7                   |
| b <sup>20</sup>    | 2008.836         | 2008.846      | 4.8                   |
| b <sup>21</sup>    | 2175.834         | 2175.847      | 5.8                   |
| b <sup>24</sup>    | 2522.983         | 2522.992      | 3.6                   |
| b <sup>25</sup>    | 2652.025         | 2652.035      | 3.6                   |
| b <sup>6</sup>     | 486.190          | 486.191       | 2.2                   |
| c <sup>10</sup>    | 937.396          | 937.400       | 3.6                   |
| c <sup>12</sup>    | 1163.491         | 1163.491      | -0.1                  |
| c <sup>13</sup>    | 1264.539         | 1264.543      | 3.4                   |
| c <sup>16</sup>    | 1535.656         | 1535.662      | 4.1                   |
| c <sup>23</sup>    | 2376.945         | 2376.938      | -3.2                  |
| c <sup>6</sup>     | 503.216          | 503.218       | 4.1                   |
| c <sup>8</sup>     | 687.301          | 687.302       | 1.9                   |
| c <sup>9</sup>     | 774.333          | 774.335       | 3.0                   |
| y <sup>10</sup>    | 1186.443         | 1186.448      | 3.9                   |
| y <sup>11</sup>    | 1349.506         | 1349.512      | 4.5                   |
| y <sup>13</sup>    | 1533.591         | 1533.599      | 5.0                   |
| y <sup>13</sup>    | 1533.591         | 1533.595      | 2.8                   |
| y <sup>13</sup> +1 | 1532.583         | 1532.588      | 3.1                   |
| y <sup>14</sup>    | 1620.623         | 1620.631      | 4.5                   |
| y <sup>16</sup>    | 1818.724         | 1818.729      | 3.0                   |
| y <sup>20</sup>    | 2294.914         | 2294.922      | 3.4                   |
| y <sup>21</sup>    | 2381.946         | 2381.953      | 2.6                   |
| y <sup>3</sup>     | 345.154          | 345.154       | 2.1                   |
| y <sup>4</sup>     | 508.217          | 508.218       | 2.7                   |
| y <sup>6</sup>     | 692.302          | 692.304       | 3.2                   |
| y <sup>7</sup>     | 859.300          | 859.301       | 1.6                   |
| y <sup>9</sup>     | 1057.401         | 1057.404      | 2.8                   |
| z <sup>3</sup>     | 329.135          | 329.138       | 9.9                   |

3 G P G S G M L S P S I V I E L P I T S I S P I S V I L E P T S P S I V I L E 26  
 20]P T

| Identified Ions    | Theoretical mass | Observed mass | Mass Difference (ppm) |
|--------------------|------------------|---------------|-----------------------|
| a <sup>11</sup> +1 | 1022.425         | 1022.419      | -6.4                  |
| a <sup>14</sup> +1 | 1387.524         | 1387.516      | -5.8                  |
| a <sup>10</sup>    | 892.375          | 892.379       | 4.5                   |
| a <sup>13</sup>    | 1219.518         | 1219.508      | -8.0                  |
| a <sup>25</sup>    | 2624.030         | 2624.044      | 5.2                   |
| b <sup>10</sup>    | 920.370          | 920.372       | 2.2                   |
| b <sup>11</sup>    | 1049.412         | 1049.416      | 3.6                   |
| b <sup>13</sup>    | 1247.513         | 1247.516      | 2.8                   |
| b <sup>16</sup>    | 1598.596         | 1598.604      | 4.7                   |
| b <sup>17</sup>    | 1761.659         | 1761.666      | 3.7                   |
| b <sup>18</sup>    | 1890.702         | 1890.708      | 3.2                   |
| b <sup>20</sup>    | 2088.802         | 2088.803      | 0.2                   |
| b <sup>24</sup>    | 2522.983         | 2522.990      | 2.9                   |
| b <sup>25</sup>    | 2652.025         | 2652.035      | 3.8                   |
| b <sup>9</sup>     | 757.307          | 757.309       | 3.6                   |
| c <sup>12</sup>    | 1163.491         | 1163.490      | -1.6                  |
| c <sup>16</sup>    | 1615.622         | 1615.629      | 4.2                   |
| c <sup>23</sup>    | 2376.945         | 2376.946      | 0.1                   |
| c <sup>9</sup>     | 774.333          | 774.335       | 3.0                   |
| x <sup>8</sup>     | 906.361          | 906.367       | 6.8                   |
| x <sup>9</sup>     | 1003.413         | 1003.405      | -8.2                  |
| y <sup>10</sup>    | 1106.477         | 1106.483      | 5.3                   |
| y <sup>10</sup>    | 1106.477         | 1106.480      | 2.8                   |
| y <sup>12</sup>    | 1356.572         | 1356.567      | -3.4                  |
| y <sup>13</sup>    | 1453.625         | 1453.635      | 7.1                   |
| y <sup>13</sup> -1 | 1452.617         | 1452.613      | -2.5                  |
| y <sup>14</sup>    | 1620.623         | 1620.630      | 4.1                   |
| y <sup>16</sup>    | 1818.724         | 1818.730      | 3.2                   |
| y <sup>16</sup> -1 | 1817.716         | 1817.718      | 1.4                   |
| y <sup>20</sup>    | 2294.914         | 2294.925      | 4.6                   |
| y <sup>21</sup>    | 2381.946         | 2381.952      | 2.2                   |
| y <sup>3</sup>     | 345.154          | 345.154       | 2.2                   |
| y <sup>5</sup>     | 595.249          | 595.251       | 3.8                   |
| y <sup>6</sup>     | 692.302          | 692.304       | 2.9                   |
| y <sup>7</sup>     | 779.334          | 779.337       | 3.8                   |
| y <sup>9</sup>     | 977.434          | 977.437       | 2.7                   |

4 G P G S G M L S P S I V I E L P I T S I S P I S V I L E P T S I S P I S V I L E 26  
 20]P T

| Identified Ions    | Theoretical mass | Observed mass | Mass Difference (ppm) |
|--------------------|------------------|---------------|-----------------------|
| a <sup>10</sup> +1 | 973.349          | 973.348       | -1.6                  |
| a <sup>11</sup> +1 | 1102.392         | 1102.388      | -3.7                  |
| a <sup>22</sup>    | 2244.892         | 2244.913      | 9.1                   |
| b <sup>10</sup>    | 1000.336         | 1000.339      | 2.4                   |
| b <sup>11</sup>    | 1129.379         | 1129.381      | 1.9                   |
| b <sup>14</sup>    | 1414.511         | 1414.513      | 1.6                   |
| b <sup>16</sup>    | 1598.596         | 1598.610      | 8.7                   |
| b <sup>17</sup>    | 1761.659         | 1761.665      | 3.4                   |
| b <sup>18</sup>    | 1890.702         | 1890.706      | 2.0                   |
| b <sup>20</sup>    | 2088.802         | 2088.803      | 0.1                   |
| b <sup>23</sup>    | 2359.919         | 2359.937      | 7.5                   |
| b <sup>24</sup>    | 2522.983         | 2522.988      | 2.3                   |
| b <sup>25</sup>    | 2652.025         | 2652.033      | 3.2                   |
| b <sup>6</sup>     | 486.190          | 486.191       | 2.6                   |
| b <sup>7</sup>     | 653.188          | 653.189       | 2.1                   |
| c <sup>13</sup>    | 1344.505         | 1344.513      | 5.5                   |
| c <sup>16</sup>    | 1615.622         | 1615.628      | 3.4                   |
| c <sup>23</sup>    | 2376.945         | 2376.950      | 2.1                   |
| c <sup>9</sup>     | 854.299          | 854.301       | 1.8                   |
| y <sup>10</sup>    | 1106.477         | 1106.479      | 2.2                   |
| y <sup>11</sup>    | 1269.540         | 1269.543      | 2.4                   |
| y <sup>12</sup>    | 1356.572         | 1356.574      | 1.6                   |
| y <sup>13</sup>    | 1453.625         | 1453.630      | 3.4                   |
| y <sup>14</sup>    | 1540.657         | 1540.663      | 3.7                   |
| y <sup>16</sup>    | 1738.757         | 1738.762      | 2.4                   |
| y <sup>21</sup>    | 2381.946         | 2381.950      | 1.4                   |
| y <sup>3</sup>     | 345.154          | 345.154       | 1.9                   |
| y <sup>5</sup>     | 595.249          | 595.250       | 1.9                   |
| y <sup>6</sup>     | 692.302          | 692.304       | 2.5                   |
| y <sup>7</sup>     | 779.334          | 779.336       | 3.3                   |
| y <sup>9</sup>     | 977.434          | 977.437       | 2.5                   |
| z <sup>10</sup>    | 1090.458         | 1090.465      | 6.3                   |
| z <sup>3</sup>     | 329.135          | 329.138       | 9.9                   |

Supplementary Figure 12: Lists of fragment ions for mono-phosphorylated peptides (m/z of 957.05) analyzed in Figure 6E by UVPD-MS. In each case, the 3+ charge state was selected, and UVPD was performed using 2 pulses (1.5 mJ per pulse). The identified site of phosphorylation is shaded in blue in the sequence map above each table.

2 G P G S G M (S P L S I V L S P T L S L P S L V L E L P T L S L P S I V S) 23  
 24 P T

| Identified Ions    | Theoretical mass | Observed mass | Mass Difference (ppm) |
|--------------------|------------------|---------------|-----------------------|
| a <sup>11</sup> +1 | 980.415          | 980.411       | -3.9                  |
| a <sup>14</sup> +1 | 1265.547         | 1265.539      | -6.3                  |
| a <sup>8</sup> +1  | 643.287          | 643.288       | 1.1                   |
| a <sup>10</sup>    | 892.375          | 892.366       | -10.2                 |
| a <sup>12</sup>    | 1076.460         | 1076.455      | -4.4                  |
| a <sup>13</sup>    | 1177.507         | 1177.497      | -9.0                  |
| a <sup>18</sup>    | 1740.730         | 1740.718      | -6.8                  |
| a <sup>21</sup>    | 2025.863         | 2025.872      | 4.8                   |
| b <sup>11</sup>    | 1007.402         | 1007.402      | 0.4                   |
| b <sup>13</sup>    | 1205.502         | 1205.505      | 2.6                   |
| b <sup>14</sup>    | 1292.534         | 1292.538      | 2.6                   |
| b <sup>16</sup>    | 1476.619         | 1476.627      | 5.5                   |
| b <sup>17</sup>    | 1639.682         | 1639.687      | 2.6                   |
| b <sup>18</sup>    | 1768.725         | 1768.726      | 0.8                   |
| b <sup>20</sup>    | 1966.825         | 1966.832      | 3.3                   |
| b <sup>24</sup>    | 2401.006         | 2401.011      | 2.1                   |
| b <sup>25</sup>    | 2568.004         | 2568.013      | 3.4                   |
| b <sup>9</sup>     | 757.307          | 757.310       | 4.5                   |
| c <sup>10</sup>    | 937.396          | 937.400       | 4.0                   |
| c <sup>16</sup>    | 1493.645         | 1493.651      | 3.7                   |
| c <sup>23</sup>    | 2254.969         | 2254.976      | 3.2                   |
| c <sup>8</sup>     | 687.301          | 687.302       | 2.3                   |
| c <sup>9</sup>     | 774.333          | 774.335       | 2.2                   |
| y <sup>10</sup>    | 1144.433         | 1144.435      | 2.6                   |
| y <sup>11</sup>    | 1307.496         | 1307.500      | 3.3                   |
| y <sup>13</sup>    | 1491.581         | 1491.583      | 1.6                   |
| y <sup>13</sup>    | 1491.581         | 1491.586      | 3.8                   |
| y <sup>14</sup>    | 1578.613         | 1578.615      | 1.5                   |
| y <sup>16</sup>    | 1776.713         | 1776.719      | 3.0                   |
| y <sup>17</sup>    | 1863.745         | 1863.749      | 2.1                   |
| y <sup>20</sup>    | 2210.893         | 2210.901      | 3.7                   |
| y <sup>21</sup>    | 2297.925         | 2297.933      | 3.5                   |
| y <sup>3</sup>     | 383.109          | 383.110       | 1.2                   |
| y <sup>6</sup>     | 730.258          | 730.259       | 1.8                   |
| y <sup>7</sup>     | 817.290          | 817.292       | 2.6                   |
| y <sup>9</sup>     | 1015.390         | 1015.392      | 1.9                   |

3 G P G S G M (S P L S I V L S P T L S L P S L V L E L P T L S L P S I V S) 23  
 24 P T

| Identified Ions    | Theoretical mass | Observed mass | Mass Difference (ppm) |
|--------------------|------------------|---------------|-----------------------|
| a <sup>12</sup> +1 | 1157.434         | 1157.441      | 6.1                   |
| a <sup>14</sup> +1 | 1345.514         | 1345.508      | -4.1                  |
| b <sup>10</sup>    | 920.370          | 920.372       | 2.3                   |
| b <sup>13</sup>    | 1285.469         | 1285.471      | 2.2                   |
| b <sup>14</sup>    | 1372.501         | 1372.505      | 3.5                   |
| b <sup>16</sup>    | 1556.585         | 1556.588      | 1.4                   |
| b <sup>17</sup>    | 1719.649         | 1719.653      | 2.5                   |
| b <sup>18</sup>    | 1848.691         | 1848.698      | 3.5                   |
| b <sup>20</sup>    | 2046.792         | 2046.797      | 2.7                   |
| b <sup>21</sup>    | 2133.824         | 2133.830      | 2.7                   |
| b <sup>24</sup>    | 2480.972         | 2480.977      | 1.9                   |
| b <sup>25</sup>    | 2568.004         | 2568.013      | 3.7                   |
| b <sup>9</sup>     | 757.307          | 757.309       | 2.9                   |
| c <sup>13</sup>    | 1302.495         | 1302.501      | 4.7                   |
| c <sup>16</sup>    | 1573.612         | 1573.616      | 2.9                   |
| c <sup>23</sup>    | 2334.935         | 2334.940      | 2.1                   |
| c <sup>8</sup>     | 687.301          | 687.303       | 3.2                   |
| c <sup>9</sup>     | 774.333          | 774.335       | 2.2                   |
| x <sup>8</sup> +1  | 865.358          | 865.359       | 0.7                   |
| y <sup>10</sup>    | 1064.466         | 1064.469      | 2.7                   |
| y <sup>11</sup>    | 1227.530         | 1227.531      | 1.5                   |
| y <sup>12</sup>    | 1314.562         | 1314.560      | -1.6                  |
| y <sup>13</sup>    | 1411.614         | 1411.619      | 3.2                   |
| y <sup>14</sup>    | 1498.646         | 1498.653      | 4.2                   |
| y <sup>16</sup> -1 | 1695.739         | 1695.741      | 1.3                   |
| y <sup>17</sup>    | 1863.745         | 1863.749      | 2.1                   |
| y <sup>18</sup>    | 2026.808         | 2026.820      | 5.5                   |
| y <sup>20</sup>    | 2210.893         | 2210.900      | 3.2                   |
| y <sup>21</sup>    | 2297.925         | 2297.933      | 3.4                   |
| y <sup>6</sup>     | 650.291          | 650.293       | 2.7                   |
| y <sup>7</sup>     | 737.323          | 737.325       | 2.7                   |
| y <sup>8</sup>     | 838.371          | 838.372       | 0.7                   |
| y <sup>9</sup>     | 935.424          | 935.425       | 1.4                   |
| z <sup>19</sup>    | 2097.822         | 2097.811      | -5.0                  |

4 G P G S G M (S P L S I V L S P T L S L P S L V L E L P T L S L P S I V S) 23  
 24 P T

| Identified Ions    | Theoretical mass | Observed mass | Mass Difference (ppm) |
|--------------------|------------------|---------------|-----------------------|
| a <sup>10</sup> +1 | 973.349          | 973.357       | 8.1                   |
| b <sup>10</sup>    | 1000.336         | 1000.338      | 2.0                   |
| b <sup>11</sup>    | 1087.368         | 1087.370      | 1.4                   |
| b <sup>13</sup>    | 1285.469         | 1285.472      | 2.6                   |
| b <sup>14</sup>    | 1372.501         | 1372.505      | 2.9                   |
| b <sup>16</sup>    | 1556.585         | 1556.595      | 6.2                   |
| b <sup>17</sup>    | 1719.649         | 1719.653      | 2.5                   |
| b <sup>18</sup>    | 1848.691         | 1848.698      | 3.7                   |
| b <sup>20</sup>    | 2046.792         | 2046.798      | 3.2                   |
| b <sup>21</sup>    | 2133.824         | 2133.829      | 2.5                   |
| b <sup>24</sup>    | 2480.972         | 2480.978      | 2.6                   |
| b <sup>25</sup>    | 2568.004         | 2568.013      | 3.7                   |
| b <sup>6</sup>     | 486.190          | 486.191       | 1.7                   |
| c <sup>16</sup>    | 1573.612         | 1573.617      | 3.0                   |
| c <sup>23</sup>    | 2334.935         | 2334.941      | 2.6                   |
| c <sup>9</sup>     | 854.299          | 854.302       | 3.1                   |
| y <sup>10</sup>    | 1064.466         | 1064.469      | 2.7                   |
| y <sup>11</sup>    | 1227.530         | 1227.531      | 1.3                   |
| y <sup>13</sup>    | 1411.614         | 1411.617      | 1.9                   |
| y <sup>14</sup>    | 1498.646         | 1498.651      | 3.3                   |
| y <sup>17</sup>    | 1783.779         | 1783.784      | 2.9                   |
| y <sup>20</sup>    | 2130.927         | 2130.943      | 7.3                   |
| y <sup>21</sup>    | 2297.925         | 2297.935      | 4.3                   |
| y <sup>4</sup>     | 466.206          | 466.207       | 1.8                   |
| y <sup>6</sup>     | 650.291          | 650.293       | 3.0                   |
| y <sup>7</sup>     | 737.323          | 737.326       | 3.3                   |
| y <sup>8</sup>     | 838.371          | 838.369       | -2.4                  |
| y <sup>9</sup>     | 935.424          | 935.426       | 3.0                   |
| z <sup>19</sup>    | 2017.855         | 2017.843      | -6.0                  |

Supplementary Figure 13: Lists of fragment ions for mono-phosphorylated peptides (m/z of 929.05) analyzed in Figure 6F by UVPD-MS. In each case, the 3+ charge state was selected, and UVPD was performed using 2 pulses (1.5 mJ per pulse). The identified site of phosphorylation is shaded in blue in the sequence map above each table.
